1 **Serotonergic Modulation of a Visual Microcircuit in *Drosophila melanogaster***

2 **Katherine M Myers Gschweng<sup>1,3\*</sup>, Maureen M Sampson<sup>1,2\*</sup>, Ben J Hardcastle<sup>4</sup>, Tyler R**  
3 **Sizemore<sup>5</sup>, Andrew M Dacks<sup>5</sup>, Mark A Frye<sup>4</sup>, David E Krantz<sup>1,3</sup>**

4 **\*These authors contributed equally**

5 <sup>1</sup>UCLA, Hatos Center for Neuropharmacology, Los Angeles, CA, USA

6 <sup>2</sup>UCLA, Molecular Toxicology Interdepartmental Program, Los Angeles, CA, USA

7 <sup>3</sup>UCLA, Psychiatry and Biobehavioral Sciences, David Geffen School of Medicine, Los Angeles,  
8 CA, USA

9 <sup>4</sup>UCLA, Department of Integrative Biology and Physiology, Los Angeles, CA, USA

10 <sup>5</sup>Department of Biology, West Virginia University, Morgantown, WV, USA

11

12

13 **Abstract**

14 Serotonin (5-HT, 5-hydroxytryptamine) and other neuromodulators tune circuit activity to  
15 impart behavioral flexibility and adaptation. We demonstrate that *Drosophila* optic lobe neurons  
16 involved in the initial steps of visual processing are subject to serotonergic neuromodulation.  
17 The visual processing neurons L2 and T1 express 5-HT<sub>2B</sub> and 5-HT<sub>1</sub>-type receptors,  
18 respectively. Serotonin increases calcium in L2, but not T1 neurons, and serotonin potentiates  
19 the L2 neuron response to luminance increases. While we did not detect serotonin receptor  
20 expression in L1 neurons, they also undergo serotonin-induced calcium changes, likely through  
21 electrical coupling between L1 and L2 neurons. We also found that L2 and T1 form reciprocal  
22 synapses onto serotonergic projections in the medulla, forming a potential feedback loop.  
23 Together, these results describe a serotonergic microcircuit for regulating the first steps of visual  
24 processing in *Drosophila*.

## 25 Introduction

26 Behavioral flexibility requires dynamic changes in neural circuit function, which is often  
27 achieved by aminergic or peptidergic neuromodulatory signaling (Katz, 1999; Kupfermann,  
28 1979; Marder, 2012; Marder et al., 2014; Nadim et al., 2014). Neuromodulators alter the  
29 biophysical and synaptic properties of individual neurons and circuits to shape behavior and to  
30 meet the animal's changing needs (Katz, 1999; Kupfermann, 1979; Marder, 2012; Marder et al.,  
31 2014; Nadim et al., 2014). Serotonin acts a neuromodulator in a variety of circuits including the  
32 sensory systems required for olfaction, hearing, and vision (Andres et al., 2016; Arechiga et al.,  
33 1990; Brunert et al., 2016; Dacks et al., 2008; Fotowat et al., 2016; Kloppenburg et al., 1999;  
34 Lottem et al., 2016; Moreau et al., 2010; Papesh et al., 2016; Petzold et al., 2009; Seillier et al.,  
35 2017; Watakabe et al., 2009). In the mammalian visual cortex, serotonin regulates the balance  
36 of excitation and inhibition (Moreau et al., 2010), cellular plasticity (Gagolewicz et al., 2016; Gu  
37 et al., 1995; Lombaert et al., 2018; Wang et al., 1997), and response gain (Seillier et al., 2017;  
38 Shimegi et al., 2016). In the mammalian retina, serotonin signaling reduces GABAergic  
39 amacrine cell input to retinal ganglion cells (RGCs) via 5-HT1A (Zhou et al., 2018) and can  
40 modulate the response of RGCs to visual stimuli (Trakhtenberg et al., 2017). Multiple serotonin  
41 receptor subtypes are expressed in visual and other sensory systems; however, the manner in  
42 which serotonin receptor activation is integrated into sensory circuits to regulate information  
43 processing remains poorly understood.

44 The visual system of *Drosophila melanogaster* provides a powerful genetic model to  
45 study the mechanisms underlying visual circuit activity and regulation (Borst et al., 2015). In  
46 *Drosophila*, visual processing begins in the lamina where intrinsic monopolar neurons L1, L2,  
47 and L3 receive direct input from photoreceptors (Meinertzhagen et al., 1991). L1 and L2  
48 neurons are first-order neurons that feed into pathways discriminating light "ON" (i.e., increase  
49 in luminance) and light "OFF" (i.e., decrease in luminance) stimuli respectively (Joesch et al.,

50 2010; Strother et al., 2014). L1 and L2 neurons respond in a physiologically identical manner to  
51 changes in luminance (Clark et al., 2011; Yang et al., 2016; Zheng et al., 2006), while  
52 downstream neurons in the medulla transform this information to discriminate ON versus OFF  
53 stimuli (Strother et al., 2014). Further processing occurs in the lobula and lobula plate to  
54 mediate higher-order computations for both motion and contrast detection (Bahl et al., 2015;  
55 Behnia et al., 2015; Strother et al., 2014).

56 Serotonergic neurons broadly innervate the optic ganglia of *Drosophila* and other  
57 insects, including the lamina, medulla, lobula, and lobula plate (Hamanaka et al., 2012; Leitinger  
58 et al., 1999; Nässel et al., 1985; Nässel et al., 1987; Schafer et al., 1986; Valles et al., 1988).  
59 Significant progress has been made in mapping the synaptic connectivity of the optic lobe,  
60 including neurons required for motion detection (Meinertzhagen et al., 1991; Rivera-Alba et al.,  
61 2011; Shinomiya et al., 2019; Takemura et al., 2013; Takemura et al., 2008; Takemura et al.,  
62 2017; Takemura et al., 2015). By contrast, the connectivity of serotonergic projections in the  
63 optic lobe and the mechanisms by which serotonergic signaling may regulate visual processing  
64 in flies or other insects remains unclear.

65 Here, we leverage *Drosophila* molecular-genetic tools to identify the expression patterns  
66 of serotonin receptors present in a subset of critical visual processing lamina neurons and the  
67 connectivity of these cells. We demonstrate that serotonin signaling increases intracellular  
68 calcium and enhances stimulus-response in L2 neurons, establishing a potential mechanism for  
69 serotonergic regulation of the initial events required for visual processing.

70

71

## 72 **Results**

### 73 **Serotonergic circuitry in the optic lobe**

74 Five genes encoding serotonin receptors have been identified in the *Drosophila* genome:  
75 5-HT1A, 5-HT1B, 5-HT2A, 5-HT2B and 5-HT7 (Colas et al., 1995; Gasque et al., 2013; Saudou  
76 et al., 1992; Witz et al., 1990). To identify specific neurons in the optic lobes expressing each  
77 receptor, we expressed the marker mCD8::GFP in flies under the control of a recently  
78 characterized panel of GAL4 insertions in Minos-mediated Integration Cassettes (MiMICs) (Diao  
79 et al., 2015; Gnerer et al., 2015). MiMICS are contained within receptor-encoding genes and  
80 “mimic” their endogenous expression patterns (Venken et al., 2011). We observed distinct  
81 expression patterns for each receptor throughout the optic lobes (Figure 1), however we  
82 focused on expression in the lamina, the first optic ganglion and a region crucial for early visual  
83 processing. In particular, 5-HT1A, 5-HT1B and 5-HT2B receptor subtypes showed prominent  
84 expression in the lamina (Figure 1A-C) and we therefore concentrate on these receptor  
85 subtypes. Both 5-HT1A and 5-HT1B GFP-positive neurons innervated the lamina neuropil. We  
86 did not detect expression of either receptor in cell bodies of the lamina cortex, but rather  
87 observed GFP-labeled somata at the edge of the medulla (Figure 1A, B). 5-HT2B driven  
88 expression was prominent in lamina cortex cell bodies as well as in the lamina and medulla  
89 neuropil (Figure 1C). For 5-HT1B, additional pleomorphic labeling was observed in the lamina  
90 cortex (arrowhead in Figure 1B) in a pattern that appeared similar to that of optic lobe glia  
91 (Edwards et al., 2010). We focus here on serotonin receptor expression in lamina neurons  
92 rather than glia.

93 Serotonin immunolabeling was observed in processes within all optic ganglia as well as  
94 a cluster of 8-10 cell bodies in the accessory medulla (Figure 1D, G). The cell bodies  
95 correspond to cluster LP2 (or Cb1), previously shown to project into the medulla (Nässel, 1988;  
96 Valles et al., 1988; Xu et al., 2016). Many of the neuronal processes expressing serotonin



97 receptor MiMIC-GAL4 driven GFP showed close apposition to serotonergic boutons (Figure 1D-  
98 I). For example, 5-HT1B-expressing terminals in the distal medulla were surrounded by a  
99 honeycomb pattern of serotonergic

100 labeling (Figure 1G-I),

101 **Figure 1. Serotonin receptors and serotonergic projections in the optic lobe.** (A-I) Serotonin receptor MiMIC-  
102 GAL4 lines were crossed to UAS-  
103 mCD8::GFP to identify patterns of  
104 expression in the optic lobe. (A-C) GFP-  
105 labeled cells representing the 5-HT1A  
106 (A), 5-HT1B (B), and 5-HT2B (C)  
107 MiMIC-GAL4 lines are visible in the  
108 neuropils of the lamina (la), medulla  
109 (me), lobula (lo) and lobula plate (lp).  
110 The arrowhead in (B) marks  
111 pleomorphic 5-HT1B>GFP labeling in  
112 the lamina cortex, possibly representing  
113 glial expression. (D-F) Anti-serotonin  
114 labeled boutons were observed  
115 throughout the optic lobe, including  
116 medulla layer M2 (asterisk) and the  
117 indicated LP2 cluster of cells. (G-I) In a  
118 frontal view, serotonin boutons (G, I)  
119 surround each column containing 5-  
120 HT1B>GFP projections in the medulla  
121 (H, I). n = 6-13 brains per condition. Scale bars: 20 $\mu$ m (A-C), 25 $\mu$ m (D-F), and 10 $\mu$ m (G-I).

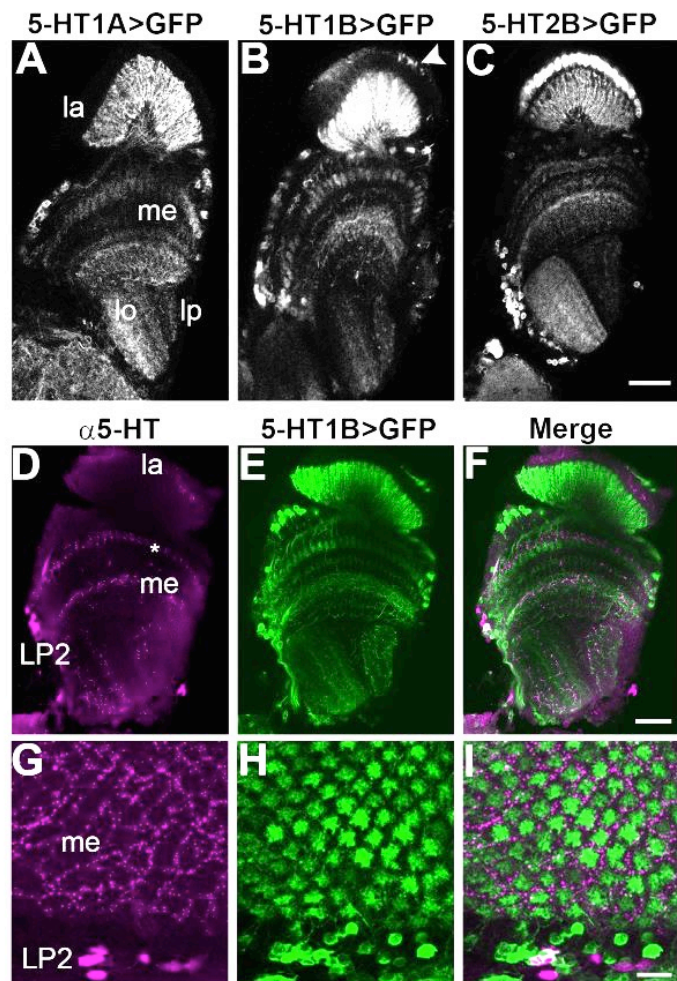

124

125

## 126 **Distinct lamina neurons express different serotonin receptors**

127 To identify individual neurons expressing serotonin receptors in the lamina, we used the  
128 receptor MiMIC-GAL4 lines in combination with the sparse labeling technique MultiColor FlpOut  
129 (MCFO-1) (Nern et al., 2015). In 5-HT1A and 5-HT1B sparse-labeling experiments we  
130 consistently observed cells with a soma in the medulla cortex, a long basket-like projection in  
131 the lamina, and a smaller projection in the medulla. This morphology is consistent with that of

132 T1 cells (Figure 2A-B, D-E, G) (Fischbach et al., 1989). Using the 5-HT2B driver, MCFO-1  
 133 labeled cells with a soma in the lamina cortex, dense projections extending into the lamina  
 134 neuropil, and a single bushy terminal in the medulla (Figure 2C, F), a morphology identical to  
 135 the lamina monopolar neuron L2 (Figure 2G) (Fischbach et al., 1989).

136 **Figure 2. T1 and L2 neurons**  
 137 **express serotonin receptors. (A-**

138 **G) Serotonin receptor MiMIC-**  
 139 **GAL4 lines were crossed to UAS-**  
 140 **MCFO-1 to sparsely label**  
 141 **individual cells in the lamina. Most**  
 142 **of the optic lobe is shown in (A-C)**  
 143 **and individual cells are shown at**  
 144 **higher magnification to illustrate**  
 145 **their morphology in (D-F). Both 5-**  
 146 **HT1A (A, D) and 5-HT1B (B, E)**  
 147 **MCFO-1 crosses revealed cells**  
 148 **with morphologies identical to T1**  
 149 **neurons. (C, F) 5-HT2B driving**  
 150 **MCFO-1 labeled cells**  
 151 **morphologically identical to L2**

152 **neurons. (G) A diagram showing lamina neurons adapted from (Fischbach et al., 1989)**  
 153 **highlights L1 (blue), L2 (green) and T1 (magenta) cells. (H-J) RT-qPCR performed on cDNA**  
 154 **from isolated T1, L2 or L1 neurons expressing GFP showed enrichment for serotonin receptors**  
 155 **relative to other GFP-negative cells from the optic lobe (H-J, top panels). End-point PCR from a**  
 156 **representative RT-qPCR reaction is shown below each bar graph (H-J, bottom panels). Scale**  
 157 **bars are 20µm (A-C) and 10µm (D-F); for (A-F) n = 10-35 brains. For (H-J), n = 3-6 biological**  
 158 **replicates; bars in (H-J) represent mean ± SEM.**

159

160 To independently confirm expression of 5-HT1A and 5-HT1B in T1 neurons, and 5-HT2B  
 161 in L2 neurons, we used split-GAL4 drivers specific for each cell type to express GFP (Tuthill et  
 162 al., 2013). GFP-labeled cells were isolated via Fluorescence Activated Cell Sorting (FACS) and  
 163 RT-qPCR was performed on isolates from either T1 or L2 cells to probe for serotonin receptor  
 164 expression. Consistent with our MCFO-1 data, RT-qPCR from GFP-labeled T1 isolates showed

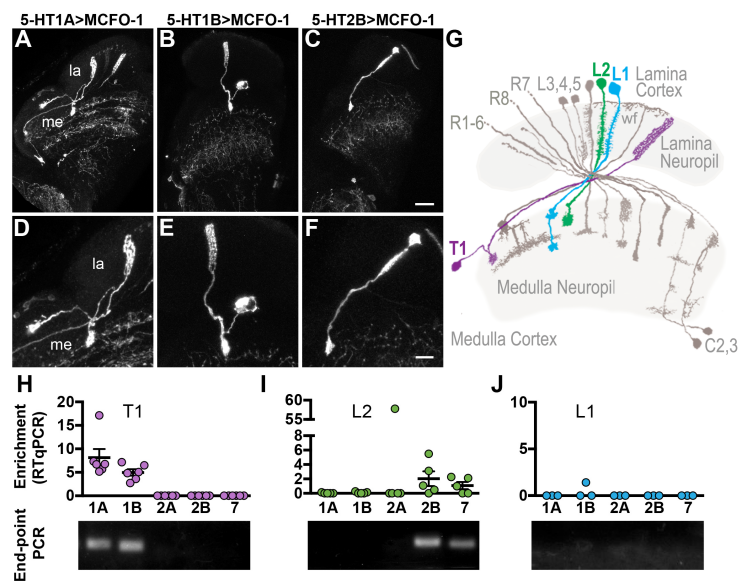

165 enrichment of both 5-HT1A and 5-HT1B transcripts, but not other serotonin receptors (Figure  
166 2H and Supplemental Table 1).

167 In contrast to T1, L2 isolates showed consistent enrichment for 5-HT2B, but not 5-HT1A  
168 or 5-HT1B transcripts (Figure 2I and Supplemental Table 1). Additional receptors were  
169 occasionally detected in the L2 samples: 5-HT7 was amplified in 3 out of 5 samples and 5-HT2A  
170 in a single sample (Figure 2I and Supplemental Table 1). It is possible that these transcripts  
171 were derived from neurons incompletely dissociated from L2 prior to FACS. Alternatively,  
172 expression of some serotonin receptors may occur in L2 in a mosaic pattern too sparse to be  
173 easily detected using single cell labeling methods such as MCFO-1.

174 We did not observe evidence of any serotonin receptor expression in L1 neurons using  
175 the serotonin receptor MiMIC-GAL4 lines to drive either mCD8::GFP or MCFO-1 (see Figure 1).  
176 In agreement with this observation, RT-qPCR from isolated L1 cells showed virtually no receptor  
177 expression, apart from one sample weakly enriched for 5-HT1B (Figure 2J and Supplemental  
178 Table 1). In sum, MCFO-1 sparse labeling in combination with RT-qPCR show that T1 neurons  
179 express 5-HT1A and 5-HT1B, L2 neurons express 5-HT2B, and L1 neurons do not detectably  
180 express any serotonin receptor subtypes. These data are consistent with a recent computational  
181 genomics study, which reported a high probability of expression for 5-HT2B in L2, 5-HT1A and  
182 5-HT1B in T1, and a low likelihood of any serotonin receptor expression in L1 neurons (Davis et  
183 al., 2018).

#### 184 **Serotonin increases calcium levels in L2 and L1 neurons**

185 To determine the potential effects of serotonin on lamina neurons expressing serotonin  
186 receptors, we bath applied serotonin and used GCaMP6f to monitor cytosolic calcium levels. 5-  
187 HT2B receptors couple with  $G_{q/11}$  and increase intracellular calcium *in vitro* (Blenau et al., 2017;  
188 Hoyer et al., 2002). To test whether serotonin could have similar effects in 5-HT2B-expressing

189 L2 neurons, we used the L2 split-GAL4 driver to express GCaMP6f (Figure 3A). After recording  
 190 a baseline in saline, the perfusion solution was switched to either saline containing 100  $\mu$ M  
 191 serotonin or saline alone. Tetrodotoxin (TTX) was included in all perfusion solutions to inhibit  
 192 synaptic input from other cells. We consistently observed a large increase in L2>GCaMP6f  
 193 fluorescence following serotonin application (Figure 3B and Supplemental Figure S1A). This  
 194 increase continued throughout the time course of recording, peaking at  $1.73 \Delta F/F \pm 0.77$  SEM  
 195 (compared to saline control  $-0.03 \Delta F/F \pm 0.05$  SEM at the same timepoint;  $p=0.0095$ ). Thus,  
 196 serotonin leads to an accumulation of cytosolic calcium in L2 cells, consistent with the predicted  
 197 outcome of activating  $G_{q/11}$  coupled 5-HT<sub>2B</sub> receptors (Blenau et al., 2017; Hoyer et al., 2002).

198

199 **Figure 3. Bath application**  
 200 **of serotonin leads to**  
 201 **increased calcium in L2 and**  
 202 **L1 neurons, but not T1**  
 203 **neurons. (A-C) GCaMP6f**  
 204 **was paired with L2, L1 and**  
 205 **T1 split GAL4 drivers to**  
 206 **monitor responses to 100**  
 207  **$\mu$ M serotonin (colored**  
 208 **traces) or saline controls**  
 209 **(gray traces). (A) The**  
 210 **experimental setup is**  
 211 **shown in the top panel,**  
 212 **along with a sample image**  
 213 **of L2 terminals (bottom**  
 214 **panel) as imaged in the**  
 215 **medulla (gray), and with the overlaid ROI used for**  
 216 **analysis (green). For bath application experiments (B, C, E, F), the first 60s of baseline is not**  
 217 **shown; traces represent data recorded following a switch at time 0 to saline with serotonin or**  
 218 **saline alone. The length of time for the switch to complete was roughly 1min 45s. In L2**  
 219 **terminals (B), serotonin application led to a significant increase in GCaMP6f signal indicating**  
 220 **increased calcium levels as compared to saline controls ( $p = 0.0095$ ). L1 terminals (C) showed a**  
 221 **similar increase in calcium following a switch to serotonin ( $p = 0.02$ ). (D) RT-qPCR from cell**  
 222 **isolates revealed enrichment of the gap junction protein ShakB in L2 and L1, but not T1**  
 223 **neurons. (E) T1 cells expressing GCaMP6f showed no significant change in calcium following**  
 224 **serotonin application ( $p>0.05$ ). (F) T1 cells expressing the voltage sensor ArcLight similarly**

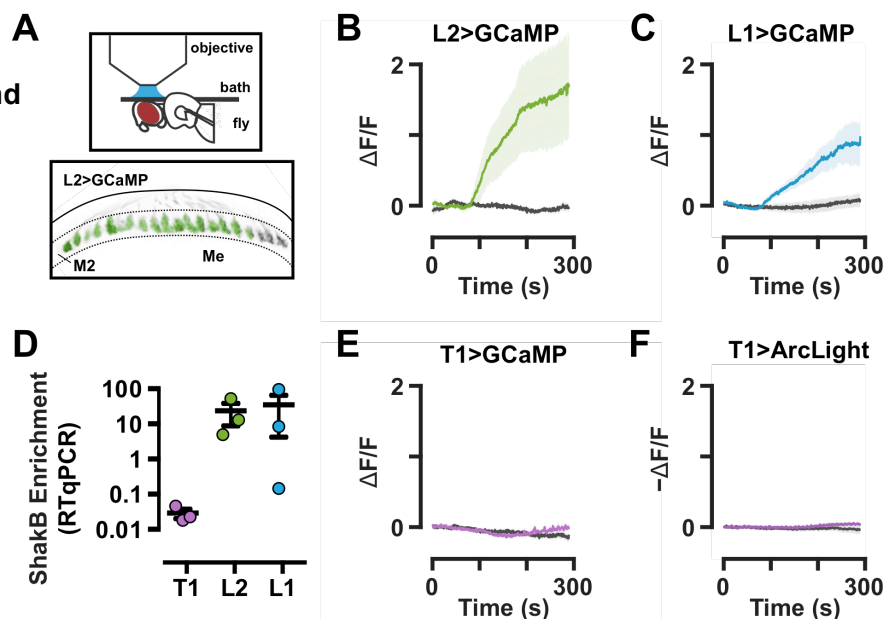

225 displayed no significant change following serotonin application ( $p > 0.05$ ). For (B, C, E, F)  $n = 4-8$   
226 individual flies; the dark trace is an average of all traces and the shaded region is 1 SD. For (D),  
227  $n = 3$  individual isolates for each cell type. Bars in (D) represent the mean  $\pm$  SEM.

228

229 We did not detect serotonin receptors in L1 neurons and therefore we did not expect  
230 serotonin to measurably change cytosolic calcium in these neurons. However, when GCaMP6f  
231 was expressed in L1 cells, we regularly observed a robust increase in baseline fluorescence  
232 following serotonin exposure with a similar latency to L2 (Figure 3C and S1B). Although the  
233 increase in GCaMP6f signal did not reach the same response amplitude as observed in L2  
234 neurons, the effect in L1 neurons similarly persisted throughout the time of recording and  
235 peaked at  $0.98 \Delta F/F \pm 0.34$  SEM (compared to saline control at  $0.07 \Delta F/F \pm 0.09$  SEM;  $p = 0.02$ ).  
236 As the experiments were performed in the presence of TTX, the serotonin response in L1 is  
237 unlikely to be a result of synaptic input; a direct action of serotonin on L1 is also unlikely due to  
238 the absence of endogenous serotonin receptors. We therefore hypothesized that electrical  
239 coupling between L1 and L2 could account for the observed effect of serotonin in L1 (Joesch et  
240 al., 2010). In support of this possibility, we found that transcripts for the gap junction protein  
241 Shaking-B (ShakB) were enriched in L1 and L2 neurons, but not T1 neurons (Figure 3D).

242 We next examined whether serotonin could affect the activity of T1 cells. Both 5-HT1A  
243 and 5-HT1B receptors, expressed in T1 neurons, are expected to couple with  $G_i$  proteins and  
244 negatively regulate adenylyl cyclase (Hoyer et al., 2002; Saudou et al., 1992). Due to the  
245 generally inhibitory function of these receptors, we hypothesized that serotonin would dampen  
246 activity in T1 neurons, possibly manifested as a decrease in cytosolic calcium. Using the T1  
247 split-GAL4 driver to express GCaMP6f, however, we did not observe a significant change in  
248 fluorescence comparable to that seen in L2 or L1 neurons (Figure 3E). Importantly, the absence  
249 of a GCaMP6f response in T1 neurons indicates that the response observed in L1 and L2 is not  
250 a generalized phenomenon common to all cells in the lamina.



251 As 5-HT<sub>1A</sub> receptor activation can lead to hyperpolarization in neurons through  
252 regulation of potassium channels (Polter et al., 2010), we also examined whether a voltage  
253 sensor could identify baseline changes in T1 cells following serotonin application. However, we  
254 did not observe any significant serotonin-evoked change in fluorescence using the voltage  
255 sensor ArcLight (Cao et al., 2013) expressed in T1 cells (Figure 3F and S1D;  $p > 0.1$ ) and further  
256 experiments will be needed to determine the effects of serotonin on T1.

### 257 **T1 and L2 provide synaptic feedback onto serotonergic neurons in the optic lobes**

258 Serotonergic circuits often receive synaptic feedback from their target networks, as is the  
259 case for long-range projections from the mammalian cortex and the retina back to the raphe  
260 (Huang et al., 2017; Ogawa et al., 2014; Pollak Dorocic et al., 2014; Weissbourd et al., 2014; T.  
261 Zhang et al., 2016). A number of processes in the fly optic lobe have been shown to be axo-  
262 dendritic and contain both pre- and post-synaptic specializations (Meinertzhagen et al., 1991;  
263 Takemura et al., 2013; Takemura et al., 2015). We speculated that serotonergic neurons in the  
264 optic lobe might not only provide modulatory input, but also receive input from optic lobe  
265 neurons. To explore this possibility, we used a SerT-GAL4 driver to express the dendritic  
266 marker DenMark (Nicolai et al., 2010) in serotonin neurons that project to the optic lobe. We  
267 found that the postsynaptic marker and serotonergic-immunolabeled puncta (representing pre-  
268 synaptic release sites) were adjacent or overlapping at multiple sites in both the lamina (data  
269 not shown) and medulla (Figure 4A).

270 To more directly test whether L1, L2 or T1 neurons synapse onto serotonergic  
271 projections in the optic lobe we used an activity-dependent synaptic version of GFP  
272 Reconstitution Across Synaptic Partners (sybGRASP) (Macpherson et al., 2015). In this variant  
273 of GRASP, the presynaptic cell expresses split-GFP fused to the synaptic vesicle protein n-  
274 synaptobrevin to direct one of the GFP fragments to vesicular release sites. The postsynaptic  
275 cell expresses a fusion of the second fragment of GFP and the membrane protein CD4

276 (Macpherson et al., 2015). When L2 was presynaptic to serotonergic processes, reconstituted  
277 GFP was observed in the lamina cortex and the medulla neuropil (Figure 4B,C and S2). In the  
278 medulla neuropil, robust punctate GFP labeling was observed in layer M2 (Figure 4C) where  
279 serotonin varicosities and L2 terminals converge. L2 neurons are cholinergic (Takemura et al.,  
280 2015), and we observed reconstituted GFP either co-localized or closely apposed *Drosophila*  
281 Vesicular Acetylcholine Transporter (VACHT) immunoreactive processes in and around M2  
282 (Figure 4B', C') (Boppana et al., 2017).

283 **Figure 4. Visual neurons form sybGRASP**  
284 **contacts onto postsynaptic serotonergic**  
285 **processes. (A)** SerT-GAL4 was used to express the  
286 postsynaptic marker DenMark. Punctate DenMark  
287 labeling (A, A'') was detected in the medulla (me)  
288 along with release sites labeled with anti-serotonin  
289 (A', A''). (B-D) For SybGRASP, L2 or T1 split GAL4  
290 drivers were used to express the presynaptic half of  
291 GFP and the postsynaptic half of GFP was  
292 expressed in serotonergic neurons using a TRH-  
293 LexA driver. (B, C) With L2 neurons presynaptic to  
294 TRH cells, sybGRASP signal was observed in cell  
295 bodies in the lamina (arrowhead, see Supplemental  
296 Figure for higher magnification) and in the medulla  
297 neuropil (boxed area in B shown at higher  
298 magnification in C). The sybGRASP signal was  
299 adjacent to VACHT, a marker for cholinergic neurons  
300 including L2 (B', C'). (D) With T1 neurons pre-  
301 synaptic to TRH, sybGRASP signal was detected in  
302 the medulla neuropil and adjacent to post-synaptic  
303 anti-serotonin immunolabeling. n = 6-13 brains per condition. Scale bars: (A) 25  $\mu$ m,  
304 (C, D) 5 $\mu$ m.

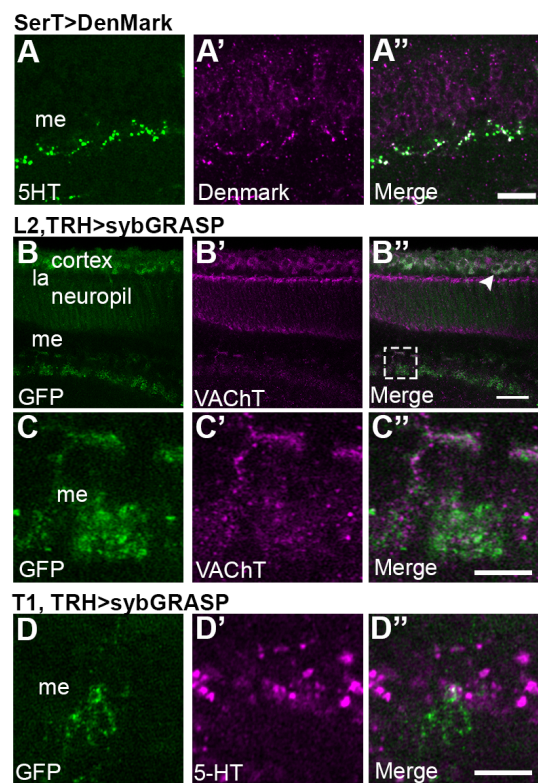

305

306 We similarly examined whether T1 neurons synapse onto serotonergic processes. As  
307 with L2 neurons, punctate GFP labeling was present throughout the M2 layer of the medulla  
308 representing contacts from T1 onto serotonergic neurons (Figure 4D). To allow co-labeling with  
309 a marker for T1, we attempted to determine its neurochemical identity using a panel of

310 molecular markers for acetylcholine, glutamate and GABA, but failed to establish that T1  
311 expresses ChAT, VGlut or GAD1 (Figure S3). We therefore relied on serotonin-immunolabeling  
312 to mark the serotonergic component of the presumptive synapses. We found that reconstituted  
313 GFP signal was adjacent to serotonin labeling in the medulla (Figure 4D”) and did detect  
314 sybGRASP labeling in the lamina (data not shown). Together, these data suggest that T1  
315 neurons synapse onto serotonergic processes in M2.

316 In contrast to L2 and T1, sybGRASP experiments in which L1 was presynaptic to  
317 serotonergic cells, did not show reconstituted GFP in M2 or elsewhere in the neuropil of either  
318 the lamina or medulla (Figure S4). However, we occasionally observed a sybGRASP signal in  
319 L1 cell bodies within the lamina cortex (Figure S4), and we also observed labeling in cell bodies  
320 in L2 sybGRASP experiments (Figure 4B and S2). We have not pursued this observation since  
321 all known synaptic communication in *Drosophila* occurs in the neuropil rather than the cortex  
322 and neurotransmitter release from lamina cell bodies has not been reported.

323

### 324 **Serotonergic neurons likely signal through volume transmission in the optic lobe**

325 Although some mammalian serotonergic neurons make synaptic connections (Gaspar et  
326 al., 2012; Herve et al., 1987; Moukhles et al., 1997) most serotonergic signaling in the  
327 mammalian brain occurs through extra-synaptic volume transmission (Bunin et al., 1999; Fuxe  
328 et al., 2010; Trueta et al., 2012; Vizi et al., 2010). Little is known about serotonergic connectivity  
329 in the *Drosophila* optic ganglia, and EM studies in other insects have revealed sites likely to  
330 represent both synaptic and non-synaptic release (Nässel et al., 1984; Nässel et al., 1985). To  
331 determine whether serotonergic neurons directly synapse upon L1, L2 or T1 cells, we again  
332 used sybGRASP with serotonergic cells expressing the presynaptic component of GFP  
333 (Macpherson et al., 2015). With SerT presynaptic to L2, T1 or L1 neurons we did not detect any



334 reconstituted GFP in the medulla (Figure S5) and only occasional GFP puncta in the lamina  
335 cortex (3 out of 7 L2 brains, see Figure S5). Although it remains possible that serotonergic  
336 synapses onto L1, L2 or T1 neurons were present but undetectable, this seems unlikely since  
337 we observed a robust signal in parallel experiments in which the post-synaptic component of  
338 GFP was expressed in serotonergic cells (see Figure 4). Together, these data suggest that  
339 most signaling from serotonergic neurons onto L1, L2 and T1 neurons is likely to occur through  
340 a non-synaptic mechanism, similar to the extensive use of volume transmission in the  
341 mammalian brain (Fuxe et al., 2010; Vizi et al., 2010).

### 342 **L2 and T1 neurons form reciprocal synaptic connections**

343 L2 and T1 terminals converge with serotonergic processes in medulla layer M2 and we  
344 reasoned that the two might have direct synaptic contact here. In examining previously  
345 published ultrastructural studies, we found that synapses have been identified from L2 onto T1  
346 neurons in the medulla, as well as from T1 onto L2 neurons, albeit to a lesser extent (Takemura  
347 et al., 2013; Takemura et al., 2015). Using sybGRASP, we observed robust signals representing  
348 presynaptic L2 contacts onto postsynaptic T1 sites and vice versa in layer M2 (Figure S6).

349 To confirm the synaptic nature of L2 and T1 neurons in this region, we used syt.eGFP  
350 and DenMark markers to label pre and postsynaptic sites, respectively. In both neuron types,  
351 we detected strong labeling with both syt.eGFP and DenMark in the medulla, supporting a  
352 mixed axo-dendritic nature for both neuron types in the medulla (Figure S7). Our GRASP data  
353 and previously published ultrastructural data are thus consistent with a reciprocal connection  
354 between L2 and T1 neurons in the medulla, and more specifically, in layer M2.

### 355 **Serotonin in visual processing**

356 Having identified serotonin receptors in L2 and T1, and robust calcium accumulation in  
357 L1 and L2 neurons in response to serotonin, we predicted that serotonergic neuromodulation

358 could impact visual processing. To test this hypothesis we used brief light or dark flashes to  
 359 stimulate L2 neurons with methods previously described (Yang et al., 2016). We expressed  
 360 GCaMP6f in L2 neurons and imaged terminals in the medulla of flies suspended over an LED  
 361 arena to present visual stimuli (see Figure 3A). Light and dark flashes of the entire LED screen,  
 362 each lasting 100 ms, were presented at 5 s intervals with intermediate-level brightness. One-  
 363 minute epochs consisting of 12 flashes of randomly shuffled polarity were presented six times  
 364 for each trial (Figure 5A). The first epoch was recorded in saline, followed by a switch to either  
 365 saline with 100  $\mu$ M serotonin or saline alone. Similar to previous observations, serotonin  
 366 perfusion increased baseline calcium levels (Figure 3B, 5A). When flies were presented with a  
 367 light flash under baseline perfusion with saline, L2 neurons responded with an initial stimulus-  
 368 mediated decrease in GCaMP6f fluorescence, followed by a sustained increase (Figure 5D),  
 369 consistent with previous results (Yang et al., 2016). Strikingly, when perfusion was switched to  
 370 saline with serotonin, the amplitude of the L2 responses to light flashes was strongly enhanced  
 371 and continued to increase over the  
 372 course of the experiment (Figure 5E, G;  
 373  $p < 0.01$ ).

374 **Figure 5. Serotonin enhances the L2**  
 375 **neuron response to light flashes.** L2  
 376 split GAL4 was crossed to UAS-  
 377 GCaMP6f to monitor calcium changes  
 378 following brief light or dark flashes, either  
 379 with or without serotonin in the perfusion  
 380 solution. A sample experiment with  
 381 serotonin is shown in (A). Light or dark  
 382 stimuli (upper middle panel) were flashed  
 383 at random every 5s. The preparation was  
 384 initially perfused with saline alone, and  
 385 the solution was switched to saline with  
 386 serotonin after one minute (lower middle  
 387 panel); the perfusion switch took  $\sim 45$ s to  
 388 complete. The time course of each  
 389 experiment was divided into 60s epochs

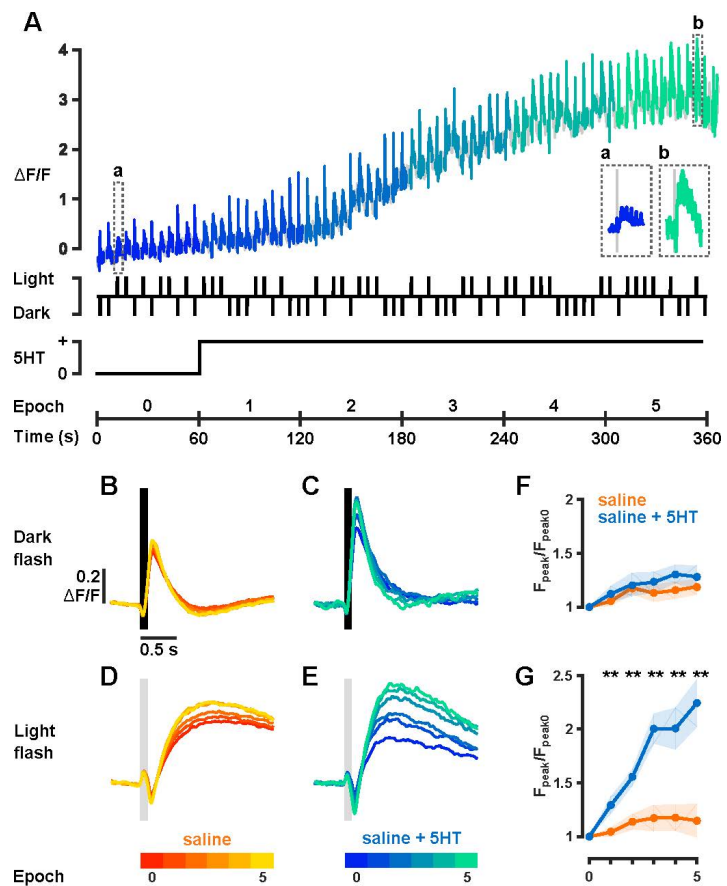

390 for analysis in **(B, C, D, E)**. The highlighted areas (**a, b**) in the top panel are also shown as  
391 insets with an expanded time scale. **(B, C, D, E)** Mean traces representing each progressive  
392 60s epoch are shown with responses to dark flashes (**B, C**) and light flashes (**D, E**). **(B)** In  
393 control experiments, L2 terminals show a strong increase in GCaMP6f fluorescence following a  
394 dark pulse before returning to baseline. **(C)** Similar waveform responses were observed  
395 following addition of serotonin to the bath. **(F)** Dark flash peaks for each 60s epoch show that  
396 serotonin did not significantly impact responses ( $p>0.05$ ). **(D)** When a light flash was presented  
397 in control experiments, L2 cells responded with a decrease in GCaMP signal followed by a large  
398 sustained increase. **(E)** The same waveform response was seen for L2 light responses in  
399 serotonin. **(G)** The peak responses following a light pulse are summarized and show that  
400 serotonin significantly increased the amplitude relatively to saline alone ( $p<0.01$ ). For (B-G)  $n =$   
401 7-11 individual flies.

402

403 Dark flashes also induced a large increase in calcium that returned to baseline within ~1  
404 second (**Figure 5B**), however, in contrast to light flashes, the effect on response amplitude to the  
405 dark flash did not differ from saline controls (**Figure 5F**;  $p>0.05$ ). These data indicate that in  
406 addition to increasing absolute intracellular calcium levels, serotonin enhances L2 responses in  
407 a stimulus specific manner.

408

## 409 Discussion

410 To begin our study of serotonergic regulation of the *Drosophila* visual system, we  
411 mapped the expression of specific subtypes of serotonin receptors to visual processing neurons  
412 in the optic lobe. We observed expression of serotonin receptors throughout the optic lobe, with  
413 distinct expression patterns, suggesting a role for serotonin signaling in visual processing.  
414 Specifically, we found that L2 neurons express 5-HT2B and that T1 neurons express 5-HT1A  
415 and 5-HT1B, while L1 neurons do not consistently show expression of any serotonin receptors.  
416 Our data are consistent with a recent report of transcriptional profiles for L1, L2, T1 as well as  
417 other optic lobe neurons (Davis et al., 2018).

418           Recent work has reported serotonin receptor expression by photoreceptors (Davis et al.,  
419 2018), and an earlier study described serotonergic modulation of potassium channels in  
420 photoreceptors (Hevers et al., 1995). However, we did not detect expression of any serotonin  
421 receptors in photoreceptors using MiMIC-GAL4 lines. It is possible that incomplete dissociation  
422 of glia, which we suggest express 5-HT1B, could have contaminated isolates of photoreceptors  
423 used in the prior genomic analysis of receptor expression (Davis et al., 2018). Likewise,  
424 incomplete dissociation could have resulted in the presence of L2 processes on photoreceptor  
425 cell preparations used for physiological preparations (Hevers et al., 1995). Since L2 provides  
426 feedback onto photoreceptors R1-6 (Meinertzhagen et al., 1991), our demonstration that  
427 serotonin modulates L2 neurons suggests a potential mechanism for the previous physiological  
428 observations (Hevers et al., 1995). The use of MiMIC-GAL4 lines bypasses issues of cell  
429 dissociation that were a caveat in previous strategies to map receptor expression. However, the  
430 lower limits detection using this strategy are unclear. Therefore, we cannot at present rule out  
431 the possibility that some photoreceptors express serotonin receptors that were not detected  
432 using the MiMIC-GAL4 lines.

433           Serotonin signaling occurs via G-protein coupled receptors, which can induce immediate  
434 or long-term changes in cell physiology. We examined acute responses to serotonin receptor  
435 activation by bath applying serotonin onto optic lobe tissue. Consistent with the predicted  
436 coupling of 5-HT2B to  $G_q$ , we found that L2 neurons respond with a robust increase in calcium  
437 measured by GCaMP6f fluorescence (Figure 3B and S1A); however, we cannot rule out a  
438 potential contribution from either 5-HT2A or 5-HT7, as both showed expression in our RT-qPCR  
439 data set (Figure 2I). In contrast to the robust increase in calcium in L2 neurons in response to  
440 serotonin, we did not observe a significant change in baseline calcium or voltage with T1  
441 neurons (Figure 3E-F and S1C-D). It is possible that serotonin regulates dynamic patterns of  
442 neuronal activity in T1 rather than static properties such as cytosolic calcium concentration or

443 resting membrane potential. Alternatively, other probes (e.g., for cAMP) may be necessary to  
444 detect the acute response of T1 to serotonin. Either possibility could explain our inability to  
445 detect an acute response to bath applied serotonin in T1 using either GCaMP or ArcLight.  
446 However, it is also possible that activation of 5HT1 receptors do not induce significant acute  
447 physiological responses, and that chronic changes in 5HT1 receptor activation are necessary to  
448 induce measurable changes in T1.

449 In L1 neurons, which do not express serotonin receptors, we unexpectedly observed a  
450 large calcium response to serotonin similar to that of L2 (Figures 3C and S1B). As these  
451 experiments were performed in the presence of the voltage-gated Na<sup>+</sup> channel inhibitor TTX,  
452 which inhibits action potentials, we expect that the effect was non-synaptic. Notably, we did not  
453 observe a comparable calcium change in T1 neurons, which do receive synaptic input from L2  
454 neurons (Figure S6) (Takemura et al., 2015). A compelling explanation for the calcium effect in  
455 L1 is that gap junction coupling with L2 neurons mediates the response indirectly (Joesch et al.,  
456 2010). Joesch et al. (2010) found that electrical coupling was able to activate both L1 and L2  
457 even when photoreceptor input to one of the two cells was blocked (Joesch et al., 2010). L1 and  
458 L2 show immunolabeling with Shaking B (Joesch et al., 2010), a gap junction protein, and we  
459 found here that both L2 and L1, but not T1 neurons, are enriched in Shaking B transcript (Figure  
460 3D). Alternatively, L1 may be electrically coupled with other as yet unidentified cells that are  
461 modulated by serotonin. Other mechanisms are also possible such as chemically mediated  
462 synaptic inputs to L1 that do not depend on action potentials. Regardless of the underlying  
463 mechanism, our data underscore the potential importance of an indirect pathway for  
464 serotonergic neuromodulation here and in other circuits.

465 In both mammals and insects, serotonin can be released extra-synaptically through  
466 volume transmission (Bunin et al., 1999; Descarries et al., 2000) or through synaptic sites  
467 (Coates et al., 2017; Gaspar et al., 2012; Herve et al., 1987; Moukhles et al., 1997; Nässel et

468 al., 1985). The ultrastructure of serotonergic processes in the optic lobe of *Drosophila* is not  
469 known; however, serotonergic release sites are exclusively non-synaptic in the lamina of the  
470 blowfly *Calliphora* (Nässel et al., 1984). Our data obtained using sybGRASP (Figure S5) imply  
471 that serotonin is released extra-synaptically in the neuropil of the medulla. Future experiments in  
472 the fly visual system may be used to explore the poorly understood relationship between volume  
473 transmission and specific sub-types of serotonin receptors.

474 Previous work in other systems indicates that feedback onto serotonergic neurons  
475 regulates circuit function (Celada et al., 2001; Ogawa et al., 2014; Pollak Dorocic et al., 2014;  
476 Weissbourd et al., 2014). This includes the mammalian visual system, in which ON and OFF  
477 RGCs modulate serotonergic neurons in the raphe (Huang et al., 2017; T. Zhang et al., 2016).  
478 Evidence for sensory system input to serotonergic neurons in insects includes an observed  
479 decrease in tonic firing in response to light in the butterfly (Ichikawa, 1994) and input to  
480 serotonergic clusters from olfactory neurons in *Drosophila* (Coates et al., 2017; X. Zhang et al.,  
481 2016). Similarly, our sybGRASP data suggest that both L2 and T1 neurons make synaptic  
482 contacts onto serotonergic processes in M2 (Figure 4). This, in addition to the reciprocal  
483 synaptic contacts between L2 and T1 in layer M2 of the medulla (Figure S6 and (Takemura et  
484 al., 2013; Takemura et al., 2015)) suggest that M2 may act as an important hub for  
485 neuromodulatory activity. The proposed microcircuit formed by these connections is  
486 summarized in Figure 6.

487 **Figure 6. Proposed circuit diagram for L2, T1, L1 and serotonin neurons in the optic lobe.**

488 Small clusters of serotonergic  
489 neurons (represented as a single  
490 orange circle) extend projections  
491 across multiple columns (gray  
492 rectangles) in the medulla. We  
493 propose that serotonin release,  
494 acting extra-synaptically (dashed  
495 lines), signals to L2 (green circles)  
496 and T1 (purple circles) neurons

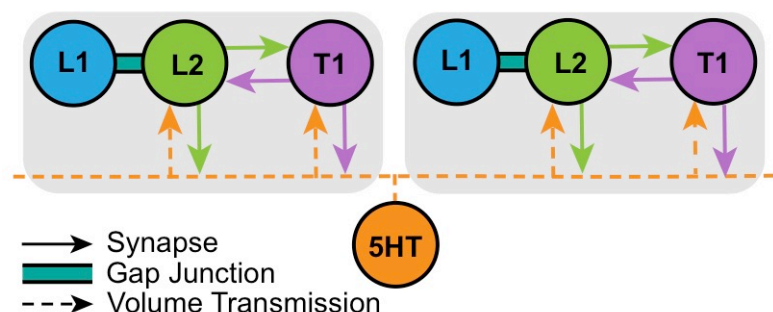

497 through receptors 5-HT2B, 5-HT1A, and 5-HT1B, respectively. Serotonin may act indirectly on  
498 L1 neurons (blue circles), which are electrically coupled to L2 (indicated as a teal bar). L2 and  
499 T1 neurons form reciprocal synaptic connections (solid arrows) with each other and with  
500 serotonin projections within layer M2 of the medulla, possibly allowing local, serotonergic  
501 neuromodulation within individual columns.

502

503           Since all of these interactions appear to occur within the same region, we speculate that  
504 M2 represents a local hub to integrate neuromodulatory information for visual processing. To  
505 further test this hypothesis, we are now developing molecular tags for 5-HT2B, 5-HT1A and 5-  
506 HT1B to determine if they localize within layer M2. Although mammalian studies have primarily  
507 focused on more long-range feedback loops, it is possible that individual serotonergic boutons  
508 in mammals could also undergo local feedback, a potential mechanism to regulate specific  
509 components of broadly projecting serotonergic neurons.

510           Serotonin modulates circadian behaviors in *Drosophila* (Nichols, 2007; Yuan et al.,  
511 2005) and previous studies in other insects have found that serotonin levels vary throughout the  
512 day (Kloppenburg et al., 1999; Saifullah et al., 2002), possibly correlating with changes in  
513 photosensory input. It is possible that these effects are in part mediated by serotonergic  
514 activation of L2 or other neurons involved in the initial steps of visual processing. Cell-specific  
515 knock down of 5-HT2B or other serotonin receptors could be used to address this possibility.  
516 Here, we focus on the effects of serotonin on visual processing.

517           In *Drosophila*, L1 and L2 neurons detect changes in luminance and together are  
518 necessary for the full complement of motion vision. Both neurons receive synaptic input from  
519 photoreceptors, and respond to luminance changes with graded potentials, depolarizing in dark  
520 conditions and hyperpolarizing in light (Clark et al., 2011; Yang et al., 2016; Zheng et al., 2006).  
521 These two neurons feed into parallel pathways to enable further visual processing such as  
522 motion and contrast detection (Bahl et al., 2015; Maisak et al., 2013; Strother et al., 2014). The



523 enhancement of visually induced calcium transients in L2 following serotonin application (Figure  
524 5G) suggests a role for serotonin in potentiating the response of L2-dependent visual  
525 processing pathways (Yang et al., 2016). It is possible that serotonin could regulate the  
526 response to synaptic input from photoreceptors. Alternatively increased calcium levels in L2  
527 terminals following serotonin application could increase neurotransmitter release onto the  
528 neurons postsynaptic to L2. In either case, the effects of serotonin on L2-dependent pathways  
529 will only become evident in experiments testing the responses of downstream neurons such as  
530 Tm1, Tm2 and Tm4 (Shinomiya et al., 2014; Takemura et al., 2013; Takemura et al., 2011).

531 In general, both L1 and L2 respond to both light and dark flashes and it is unclear why  
532 the response of L2 to dark pulses was not significantly enhanced by serotonin (Figure 5F).  
533 Unlike the experiments shown in Figure 3, TTX was absent from the perfusion for the visual  
534 response experiments shown in Figure 5, so it is possible that the observed effects of serotonin  
535 on L2 include input from additional sites, and that non cell-autonomous serotonergic effects  
536 dampened the response of L2 to dark flashes. Previous experiments in *Calliphora* underscore  
537 this possibility and the complexity of serotonin's effects on the visual system (Chen et al., 1999).  
538 In these previous studies, extracellular electroretinograms were used to record the combined  
539 output of L1 and L2 neurons in the lamina (Chen et al., 1999). While injection of serotonin into  
540 the haemolymph increased both the light ON and the light OFF transients, serotonin injected  
541 directly into the retina led to a net reduction in both the ON and OFF responses (Chen et al.,  
542 1999). These complex effects suggest that multiple serotonergic pathways can influence the  
543 activity of L1 and L2 neurons, possibly including non-cell autonomous activation of serotonin  
544 receptors on neurons that innervate L1 and/or L2 neurons.

545 To understand these effects and to identify the mechanisms by which serotonin  
546 regulates visual processing it will be necessary to examine multiple cellular components in the  
547 ON/OFF pathways beyond L2. Studies in mammals have already begun to dissect the



548 contributions of serotonergic tuning in multiple cells within individual circuits including the visual  
549 system (Gagolewicz et al., 2016; Halberstadt, 2015; Li et al., 2018; Moreau et al., 2010; Zhou et  
550 al., 2018). However, the way in which this information is integrated remains poorly understood.  
551 We speculate that interactions between receptors expressed on L2, T1 and other neurons in the  
552 fly visual system may provide a framework to dissect the mechanism by which multiplexed  
553 serotonergic inputs combine to regulate circuit function.

554 In other dipteran species, T1 neurons respond to increased luminance with a  
555 hyperpolarization and decreased luminance with a depolarization, similar to L2 and L1  
556 (Douglass et al., 1995; Järvilehto et al., 1973). In *Drosophila*, depolarizing T1 neurons leads to  
557 disruptions in steering and other visually directed behavior (Tuthill et al., 2013), however its  
558 precise role in visual processing remains enigmatic. Interestingly, the same behavioral deficits  
559 that were seen following inactivation of L1 or L2 were seen when T1 was activated (Tuthill et al.,  
560 2013). It is possible that T1 acts to provide feedback or buffering to L2 output. Since T1, L2 and  
561 serotonergic terminals all converge in the M2 region of the medulla, we speculate that  
562 interactions in this region may be critical to visual processing as well as neuromodulatory  
563 effects. If so, testing the effects of serotonin on T1 may help us to determine its function in  
564 visual processing.

565

## 566 **Conclusion**

567 We find that L1 and L2, two neurons at the head of most visual processing pathways in  
568 *Drosophila*, respond to serotonin signaling with an increase in calcium. In L2 neurons, this was  
569 sufficient to enhance the response to bright flashes. We also identified a potential regulatory  
570 microcircuit that includes processes from serotonergic, L2, L1 and T1 neurons, all converging  
571 within medulla layer M2. Our data suggest that L2 and T1 neurons synapse directly onto

572 serotonergic projections in M2, establishing a potential mechanism for neuromodulatory  
573 feedback or a route for communicating visual input to the central brain. We demonstrate that  
574 serotonin has a multifaceted effect on visual processing by 1) selectively targeting individual cell  
575 classes via differential receptor expression, 2) leveraging indirect mechanisms to broaden  
576 sensory modulation and 3) enforcing stimulus specific response modulation by targeting distinct  
577 L2 response features. In future work, we will continue to explore the mechanisms underlying  
578 these effects and the possibility of reciprocal signaling between serotonin projections and other  
579 visual processing neurons in the optic lobe.

580

581 **Supplemental Figure S1. Individual traces for serotonin bath application experiments. (A-**  
582 **D)** Individual traces representing all experiments (Figure 3) for serotonin or saline control with  
583 L2, L1 or T1 split GAL4>GCaMP6f or T1 split GAL4>ArcLight. For all experiments, the first 60s  
584 of baseline is not shown; traces represent data recorded following a switch to saline with  
585 serotonin or saline alone. The length of time for the switch to complete was  
586 estimated to be 105s. Saline controls are gray, serotonin exposed preps are  
587 colored, and the dark line represents the mean **(A)** L2>GCaMP experiments,  
588 along with **(B)** L1>GCaMP, show an increase in calcium following serotonin  
589 application as compared to saline controls (L2,  $p = 00095$ ; L1,  $p = 0.02$ ).  
590 **(C, D)** T1 cells show no significant change with either GCaMP **(C)** or  
591 ArcLight **(D)** relative to saline ( $p > 0.05$ ).  
592 For bath application experiments,  $n =$   
593 4-8 individual flies.  
594  
595  
596  
597  
598  
599

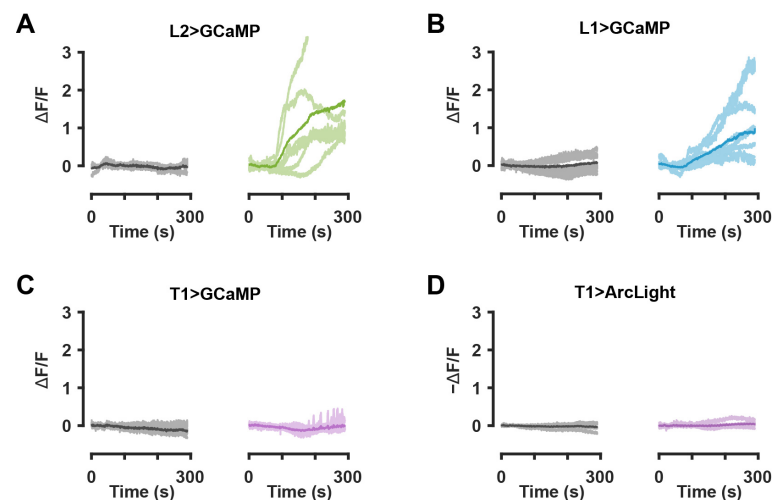

600

601 **Supplemental Figure S2. L2 sybGRASP signal**  
602 **in lamina cortex cell bodies.** With L2 neurons  
603 presynaptic to TRH cells, sybGRASP signal was  
604 observed in cell bodies in the lamina colocalized  
605 with or adjacent to anti-VACHT labeling  
606 (arrowheads).  $n = 13$  brains. Scale bar:  $5\mu\text{m}$ .

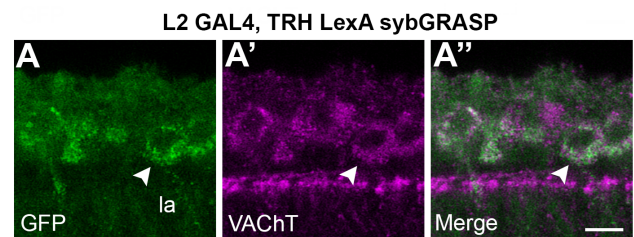

607

608

609 **Supplemental Figure S3. Serotonin receptor MiMIC-GAL4 lines with VGlut, ChAT and**  
610 **GAD1 MiMIC-LexA.** 5-HT1A, 5-HT1B or 5-HT2B MiMIC-GAL4>UAS RFP (green) were  
611 combined with VGlut (**A-C**), ChAT (**D-F**), or GAD1 (**G-I**) MiMIC-LexA>LexAop GFP (magenta).  
612 Insets show the lamina cortex cell bodies (**A-C, F**) or medulla cortex cell bodies (**D, E, G-I**).  
613 Colocalization was not observed between 5-HT1A or 5-HT1B MiMIC RFP with any of the  
614 MiMIC-LexA lines in the lamina neuropil nor medulla cortex (open arrows). Colocalization was  
615 observed between 5-HT2B MiMIC RFP and Chat MiMIC-LexA GFP in the lamina (closed  
616 triangles) but not GAD1 or VGlut. n = 4-8 brains per condition. Scale bars: 10 $\mu$ m.

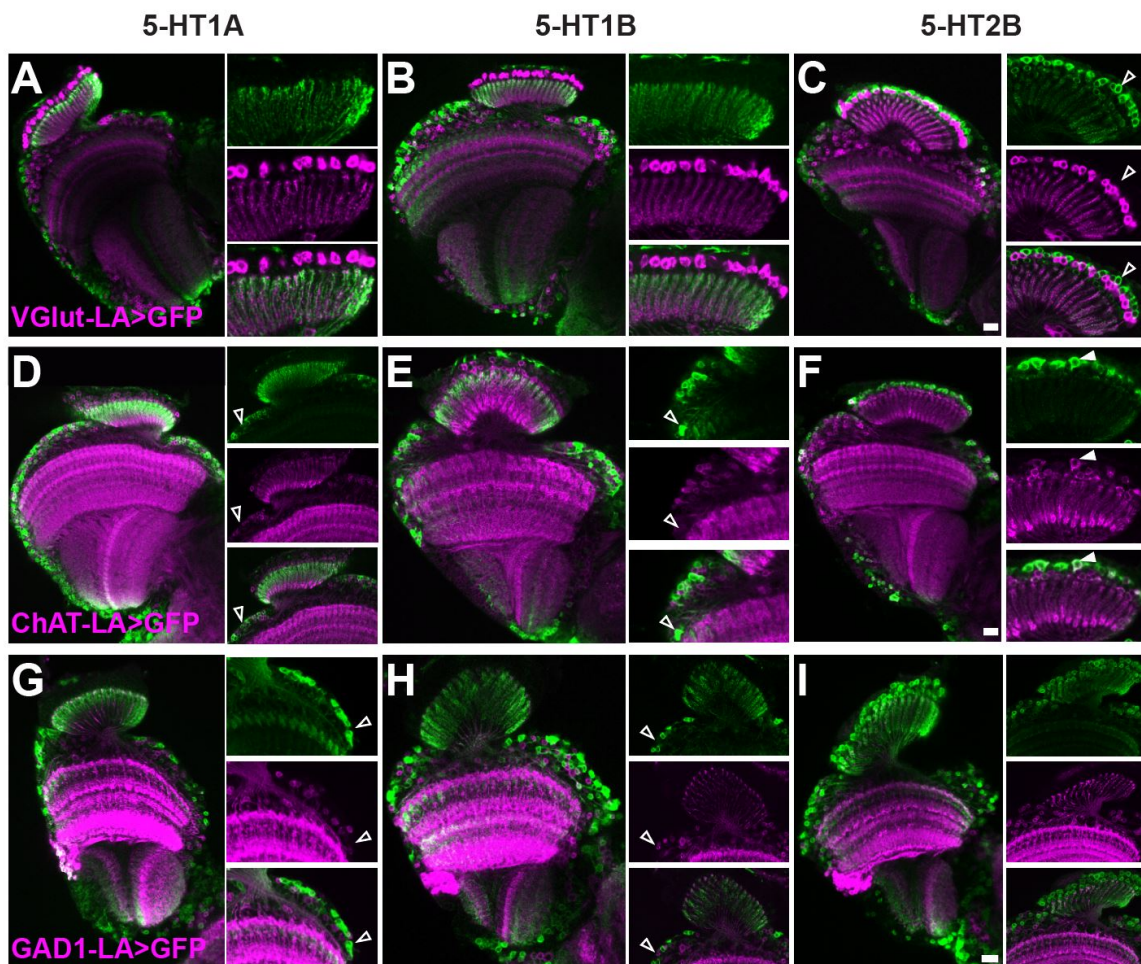

617

618

619

620



621

622 **Supplemental Figure S4. L1**  
623 **neurons do not show sybGRASP**  
624 **signal with postsynaptic**  
625 **serotonergic neurons in the**  
626 **medulla.** With L1 presynaptic to  
627 TRH, sybGRASP signal was not  
628 detected in the medulla (**A, B**) but  
629 could be seen at low levels in the cell  
630 bodies of the lamina cortex  
631 (arrowhead in **B''**) close to puncta  
632 immunolabeled for serotonin. Panels  
633 in (**B**) represents the area within the  
634 lamina cortex indicated by the  
635 rectangle in (**A**). n = 11 brains. Scale bars: 15µm (**A**); 5µm (**B**).

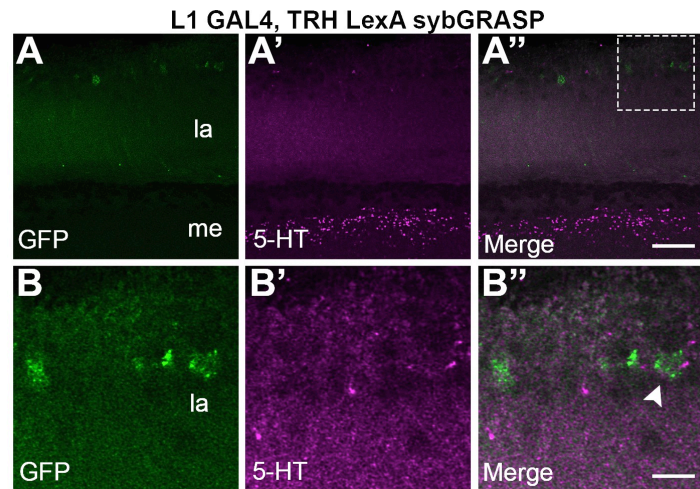

636

637 **Supplemental Figure S5.**  
638 **Serotonergic neurons do not show**  
639 **sybGRASP signal with postsynaptic**  
640 **T1, L2 or L1 neurons in the medulla.**  
641 SybGRASP was used to probe whether  
642 serotonergic neurons make synaptic  
643 contacts onto L2, T1 or L1 neurons. (**A-**  
644 **D**) A SerT-GAL4 driver was used to  
645 express the pre-synaptic portion of GFP  
646 in serotonergic neurons and LexA  
647 drivers were used to express the post  
648 synaptic portion of GFP in L2 (**A, B**) L1  
649 (**C**) or T1 (**D**) as indicated. No  
650 sybGRASP signal was detected in the  
651 medulla when SerT was presynaptic to  
652 L2 (**A**) however, occasional sparse  
653 GFP puncta (arrowhead) were visible in  
654 the lamina (**B**). When SerT was  
655 presynaptic to T1 (**C**) or L1 (**D**)  
656 neurons, we did not detect a  
657 sybGRASP signal in either the lamina  
658 or medulla. All tissue was labeled with  
659 primary antibodies to both serotonin (5-  
660 HT) and GFP. n = 7-10 brains per  
661 condition. Scale bars: 15µm (**A,C**); 5µm (**B,D**).

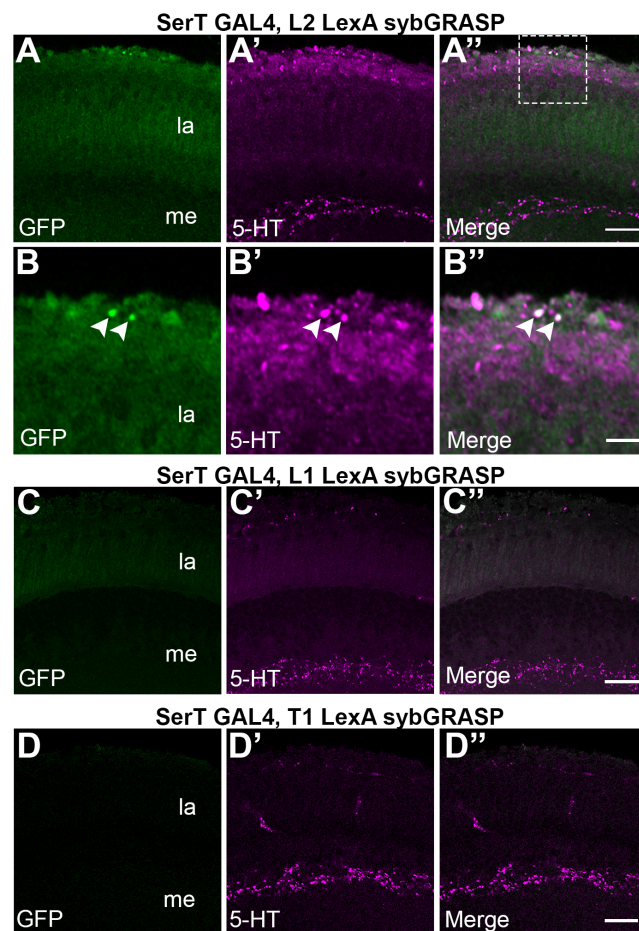

662

663

664 **Supplemental Figure S6. L2 and T1 neurons form**  
665 **reciprocal connections.** *sybGRASP* was observed with  
666 L2 split GAL4 presynaptic to T1 LexA (**A, B**) and T1 split  
667 GAL4 pre-synaptic onto L2 LexA (**C, D**). The dashed insets  
668 in (**A**) and (**C**) are shown in (**B**) and (**D**), respectively. (**A-D**)  
669 are labeled with antibody to GFP and serotonin (5-HT).  $n =$   
670 10 brains per condition. Scale bars: 15 $\mu$ m (**A,C**); 5 $\mu$ m (**B,**  
671 **D**).

672

673

674

675

676

677

678

679 **Supplemental Figure S7. Pre- and post-**  
680 **synaptic labeling with DenMark and**  
681 ***syt.eGFP*.** L2 and T1 split GAL4 lines were  
682 crossed with UAS-DenMark, UAS-  
683 *syt.eGFP* to label dendrites and  
684 presynaptic boutons, respectively. Frontal  
685 views of L2 (**A**) and T1 (**B**) neurons show  
686 overlapping *syt.eGFP* and DenMark  
687 labeled compartments. (**C**) L2 neuron  
688 drivers expressed *syt.eGFP* in the lamina  
689 and medulla, including lamina cell bodies,  
690 while the DenMark signal was primarily in  
691 the neuropil. (**D**) T1 *syt.eGFP* and  
692 DenMark expression were observed in the  
693 medulla neuropil.  $n = 3-4$  brains per  
694 condition. Scale bars: 25 $\mu$ m (**A, B**) and  
695 10 $\mu$ m (**C, D**).

696

697

698

L2 GAL4, T1 LexA *sybGRASP*

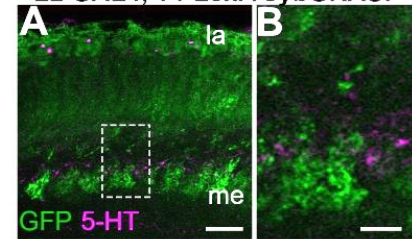

T1 GAL4, L2 LexA *sybGRASP*

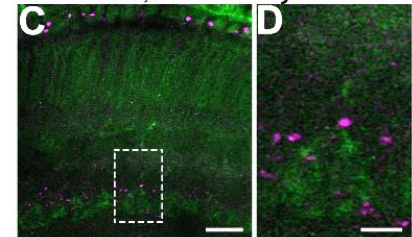

L2>DenMark, *syt.eGFP*

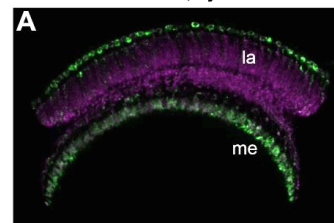

T1>DenMark, *syt.eGFP*

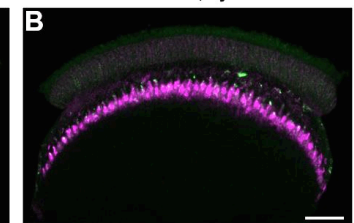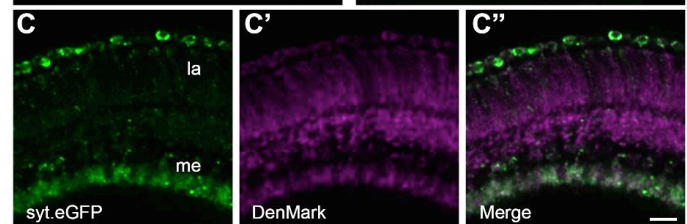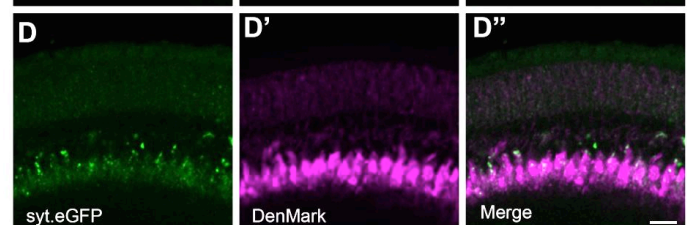





706 **Supplemental Table 3.** Animal strains used in this study.

| Figure    | Driver>Reporter                       | Genotype                                                                                                                          |
|-----------|---------------------------------------|-----------------------------------------------------------------------------------------------------------------------------------|
| 1A        | 5-HT1A MiMIC T2A<br>GAL4>UAS-MCD8-GFP | y1, w*; 5-HT1A-T2A-GAL4MI01140/UAS-mCD8::GFP;                                                                                     |
| Not Shown | 5-HT1A MiMIC T2A<br>GAL4>UAS-MCD8-GFP | y1, w*; 5-HT1A-T2A-GAL4MI04464/UAS-mCD8::GFP;                                                                                     |
| Not Shown | 5-HT1A MiMIC T2A<br>GAL4>UAS-MCD8-GFP | y1, w*; 5-HT1A-T2A-GAL4MI01468/UAS-mCD8::GFP;                                                                                     |
| 1B, 1D-I  | 5-HT1B MiMIC T2A<br>GAL4>UAS-MCD8-GFP | y1, w*; 5-HT1B-T2A-GAL4MI05213/UAS-mCD8::GFP;                                                                                     |
| 1C, 1J-L  | 5-HT2B MiMIC T2A<br>GAL4>UAS-MCD8-GFP | y1, w*;UAS-mCD8::GFP/w;5-HT2B-T2A-GAL4MI05208/w                                                                                   |
| 2A, 2D    | 5-HT1A MiMIC T2A<br>GAL4>UAS-MCFO1    | pBPhsFlp2::PEST/y1, w*; 5-HT1A-T2A-GAL4MI01140/w; HA-V5-FLAG/w                                                                    |
| Not Shown | 5-HT1A MiMIC T2A<br>GAL4>UAS-MCFO1    | pBPhsFlp2::PEST/y1, w*; 5-HT1A-T2A-GAL4MI04464/w; HA-V5-FLAG/w                                                                    |
| Not Shown | 5-HT1A MiMIC T2A<br>GAL4>UAS-MCFO1    | pBPhsFlp2::PEST/y1, w*; 5-HT1A-T2A-GAL4MI01468/w; HA-V5-FLAG/w                                                                    |
| 2B, 2E    | 5-HT1B MiMIC T2A<br>GAL4>UAS-MCFO1    | pBPhsFlp2::PEST/y1, w*; 5-HT1B-T2A-GAL4MI05213/w; HA-V5-FLAG/w                                                                    |
| 2C, 2F    | 5-HT2B MiMIC T2A<br>GAL4>UAS-MCFO1    | pBPhsFlp2::PEST/y1, w*;5-HT2B-T2A-GAL4MI05208/w; HA-V5-FLAG/w                                                                     |
| 2H        | T1spGAL4>UAS-MCD8-GFP                 | ;R31F10AD attP40/UAS-mCD8::GFP; R30F10DBD attP2/w;                                                                                |
| 2I        | L2spGAL4>UAS-MCD8-GFP                 | ;R82F12AD attP40/UAS-mCD8::GFP; R75H08DBD attP2/w;                                                                                |
| 2J        | L1spGAL4>UAS-MCD8-GFP                 | R48A08AD attP40/UAS-mCD8::GFP; R66A01DBD att P2/w;                                                                                |
| 3B        | L2spGAL4>GCaMPf                       | ;R82F12AD attP40/20XUAS-IVS-GCaMP6f attP40; R75H08DBD attP2/w                                                                     |
| 3C        | L1spGAL4>GCaMPf                       | R48A08AD attP40/20XUAS-IVS-GCaMP6f attP40; R66A01DBD att P2/w                                                                     |
| 3D        | T1spGAL4>UAS-MCD8-GFP                 | ;R31F10AD attP40/UAS-mCD8::GFP; R30F10DBD attP2/w;                                                                                |
| 3D        | L2spGAL4>UAS-MCD8-GFP                 | ;R82F12AD attP40/UAS-mCD8::GFP; R75H08DBD attP2/w;                                                                                |
| 3D        | L1spGAL4>UAS-MCD8-GFP                 | R48A08AD attP40/UAS-mCD8::GFP; R66A01DBD att P2/w;                                                                                |
| 3E        | T1>GCaMP                              | ;R31F10AD attP40/20XUAS-IVS-GCaMP6f attP40; R30F10DBD attP2/w                                                                     |
| 3F        | T1>ArcLight                           | ;R31F10AD attP40/+; R30F10DBD attP2/UAS-ArcLight attP2                                                                            |
| 4A        | SerT-GAL4>DenMark                     | w[1118]; L1/CyO; UAS-DenMark, UAS-syt.eGFP (3)/w;GMR50H05-GAL4 attP2/w                                                            |
| 4B        | L2spGAL4 onto TRH-lexA                | ;TRH-lexA/R82F12AD attP40; UAS-nSyb::spGFP1-10, LexAop-CD4::spGFP11/R75H08DBD attP2                                               |
| 4C        | T1spGAL4 onto TRH-lexA                | ;TRH-lexA/31F10AD attP40; UAS-nSyb::spGFP1-10, LexAop-CD4::spGFP11/R30F10DBD attP2                                                |
| 5         | L2spGAL4>GCaMPf                       | ;R82F12AD attP40/20XUAS-IVS-GCaMP6f attP40; R75H08DBD attP2/w                                                                     |
| Supp S1A  | L2spGAL4>GCaMPf                       | ;R82F12AD attP40/20XUAS-IVS-GCaMP6f attP40; R75H08DBD attP2/w                                                                     |
| Supp S1B  | L1spGAL4>GCaMPf                       | R48A08AD attP40/20XUAS-IVS-GCaMP6f attP40; R66A01DBD att P2/w                                                                     |
| Supp S1C  | T1spGAL4>GCaMP                        | ;R31F10AD attP40/20XUAS-IVS-GCaMP6f attP40; R30F10DBD attP2/w                                                                     |
| Supp S1D  | T1spGAL4>ArcLight                     | ;R31F10AD attP40/+; R30F10DBD attP2/UAS-ArcLight attP2                                                                            |
| Supp S2A  | 5-HT1A MiMIC>RFP,<br>VGlut MiMIC>GFP  | y1, w*, 10XUAS-IVS-mCD8::RFP, 13XLexAop2-mCD8::GFP; 5-HT1A-T2A-GAL4MI01468/Mi{Trojan-lexA:QFAD.2}VGlut[MI04979-TlexA:QFAD.2]      |
| Supp S2B  | 5-HT1B MiMIC>RFP,<br>VGlut MiMIC>GFP  | y1, w*, 10XUAS-IVS-mCD8::RFP, 13XLexAop2-mCD8::GFP; 5-HT1B-T2A-GAL4MI05213/Mi{Trojan-lexA:QFAD.2}VGlut[MI04979-TlexA:QFAD.2]      |
| Supp S2C  | 5-HT2B MiMIC>RFP,<br>VGlut MiMIC>GFP  | y1, w*, 10XUAS-IVS-mCD8::RFP, 13XLexAop2-mCD8::GFP; Mi{Trojan-lexA:QFAD.2}VGlut[MI04979-TlexA:QFAD.2]/+; 5-HT2B-T2A-GAL4MI05208/+ |

|             |                                  |                                                                                                                                  |
|-------------|----------------------------------|----------------------------------------------------------------------------------------------------------------------------------|
| Supp S2D    | 5-HT1A MiMIC>RFP, Chat MiMIC>GFP | y1, w*, 10XUAS-IVS-mCD8::RFP, 13XLexAop2-mCD8::GFP; 5-HT1A-T2A-GAL4MI01468/+; Mi{Trojan-lexA:QFAD.0}ChAT[MI04508-TlexA:QFAD.0]/+ |
| Supp S2E    | 5-HT1B MiMIC>RFP, Chat MiMIC>GFP | y1, w*, 10XUAS-IVS-mCD8::RFP, 13XLexAop2-mCD8::GFP; 5-HT1B-T2A-GAL4MI05213/+; Mi{Trojan-lexA:QFAD.0}ChAT[MI04508-TlexA:QFAD.0]/+ |
| Supp S2F    | 5-HT2B MiMIC>RFP, Chat MiMIC>GFP | y1, w*, 10XUAS-IVS-mCD8::RFP, 13XLexAop2-mCD8::GFP; ; Mi{Trojan-lexA:QFAD.0}ChAT[MI04508-TlexA:QFAD.0]/5-HT2B-T2A-GAL4MI05208    |
| Supp S2G    | 5-HT1A MiMIC>RFP, GAD1 MiMIC>GFP | y1, w*, 10XUAS-IVS-mCD8::RFP, 13XLexAop2-mCD8::GFP; 5-HT1A-T2A-GAL4MI01468/+; Mi{Trojan-lexA:QFAD.2}Gad1[MI09277-TlexA:QFAD.2]/+ |
| Supp S2H    | 5-HT1B MiMIC>RFP, GAD1 MiMIC>GFP | y1, w*, 10XUAS-IVS-mCD8::RFP, 13XLexAop2-mCD8::GFP; 5-HT1B-T2A-GAL4MI05213/+; Mi{Trojan-lexA:QFAD.2}Gad1[MI09277-TlexA:QFAD.2]/+ |
| Supp S2I    | 5-HT2B MiMIC>RFP, GAD1 MiMIC>GFP | y1, w*, 10XUAS-IVS-mCD8::RFP, 13XLexAop2-mCD8::GFP; ; Mi{Trojan-lexA:QFAD.2}Gad1[MI09277-TlexA:QFAD.2]/5-HT2B-T2A-GAL4MI05208    |
| Supp S3     | L1spGAL4 onto TRH-lexA           | ;TRH-lexA/R48A08AD attP40; UAS-nSyb::spGFP1-10, LexAop-CD4::spGFP11/R66A01DBD att P2                                             |
| Supp S4     | L2spGAL4 onto TRH-lexA           | ;TRH-lexA/R82F12AD attP40; UAS-nSyb::spGFP1-10, LexAop-CD4::spGFP11/R75H08DBD attP2                                              |
| Supp S5A-B  | SerT-GAL4 onto L2-LexA           | w[1118]; GMR16H03-lexA attP40/w; UAS-nSyb::spGFP1-10, LexAop-CD4::spGFP11/GMR50H05-GAL4 attP2                                    |
| Supp S5C    | SerT-GAL4 onto L1-LexA           | w[1118]; UAS-nSyb::spGFP1-10, LexAop-CD4::spGFP11/w; 01-LexAp65-WPRE VK00027/GMR50H05-GAL4 attP2                                 |
| Supp S5D    | SerT-GAL4 onto T1-LexA           | w[1118]; 30F10-LexAp65 attP40/w; UAS-nSyb::spGFP1-10, LexAop-CD4::spGFP11/GMR50H05-GAL4 attP2                                    |
| Supp S6A-B  | L2spGAL4 onto T1-lexA            | ;30F10-LexAp65 in attP40/R82F12AD attP40; UAS-nSyb::spGFP1-10, LexAop-CD4::spGFP11/R75H08DBD attP2                               |
| Supp S6C-D  | T1spGAL4 onto L2-lexA            | w[1118]; GMR16H03-lexA attP40/31F10AD attP40; UAS-nSyb::spGFP1-10, LexAop-CD4::spGFP11/R30F10DBD attP2                           |
| Supp S7A, C | L2spGAL4>DenMark                 | w[1118]; P{w[+mC]=UAS-DenMark}2, P{w[+mC]=UAS-syt.eGFP}2/R82F12AD attP40; R75H08DBD attP2/w                                      |
| Supp S7B, D | T1spGAL4>DenMark                 | w[1118]; P{w[+mC]=UAS-DenMark}2, P{w[+mC]=UAS-syt.eGFP}2/31F10AD attP40; R30F10DBD attP2/w                                       |

707

708

## 709 **Methods**

### 710 **Fly Husbandry and Genetic Lines**

711 Flies were maintained on a standard cornmeal and molasses-based agar media with a  
712 12:12 hour light/dark cycle at room temperature (22-25°C). Serotonin receptor MiMIC-T2A-  
713 GAL4 lines described in (Gnerer et al., 2015) were a gift from Herman Dierick (Baylor College  
714 of Medicine), and include 5-HT1A-T2A-GAL4<sup>MI01468</sup>, 5-HT1A-T2A-GAL4<sup>MI01140</sup>, 5-HT1A-T2A-  
715 GAL4<sup>MI04464</sup>, 5-HT1B-T2A-GAL4<sup>MI05213</sup>, 5-HT2B-T2A-GAL4<sup>MI06500</sup>, 5-HT2B-T2A-GAL4<sup>MI5208</sup>, and  
716 5-HT2B-GAL4<sup>MI7403</sup>. Split-GAL4 lines for L1, L2 and T1 neurons and LexA lines for L1 and T1  
717 (Tuthill et al., 2013) were provided by Aljoscha Nern (HHMI/Janelia Research Campus). SerT-  
718 GAL4 (RRID:BDSC\_38764), TRH-LexA (RRID:BDSC\_52248), L2-LexA (RRID:BDSC\_52510),



719 GAD1 Trojan LexA (RRID:BDSC\_60324), ChAT Trojan LexA (RRID:BDSC\_60319), and VGlut  
720 Trojan LexA (RRID:BDSC\_60314; provided by Quentin Gaudry (UMD)) were obtained from  
721 Bloomington *Drosophila* Stock Center at Indiana University (Bloomington, IN, USA). Reporter  
722 lines include: UAS-mCD8::GFP (RRID:BDSC\_5137), UAS-MCFO-1 (RRID:BDSC\_64085),  
723 UAS-GCaMP6f (RRID:BDSC\_42747), UAS-ArcLight (RRID:BDSC\_51056), UAS-DenMark,  
724 UAS-Syt.eGFP (RRID:BDSC\_33064 and RRID:BDSC\_33065), UAS-mCD8::RFP, LexAop-  
725 mCD8::GFP (RRID:BDSC\_32229), and UAS-nSyb::GFP1-10, LexAop-CD4:GFP11  
726 (RRID:BDSC\_64314; provided by Larry Zipursky (UCLA)).

## 727 **Immunohistochemistry and Imaging**

728 Flies were dissected 5-10 days after eclosion, and equal numbers of males and females  
729 were used for all experiments unless otherwise noted. Brains were dissected in ice-cold PBS  
730 (Alfa Aesar, Cat#J62036, Tewksbury, MA), then fixed in 4% paraformaldehyde (FisherScientific,  
731 Cat#50-980-493, Waltham, MA) in PBS with 0.3% Triton X-100 (Millipore Sigma, Cat#X100,  
732 Burlington, MA) (PBST) for one hour at room temperature. Brains were washed three times with  
733 PBST for 10 minutes, then blocked for 30 minutes in PBST containing 0.5% normal goat serum  
734 (NGS) (Cayman Chemical, Cat#10006577, Ann Arbor, MA) PBST. Antibodies were diluted in  
735 0.5% NGS/PBST. Primary antibodies were incubated with the tissue overnight at 4°C. The next  
736 day, the brains were washed three times with PBST for 10 minutes, then incubated with  
737 secondary antibodies for 2 hours in the dark at room temperature. Brains were washed three  
738 times with PBST for 10 minutes, followed by 60% and 80% glycerol (Millipore Sigma,  
739 Cat#G5516) before mounting with Fluoromount-G (SouthernBiotech, Cat#0100-01, Birmingham,  
740 AL).

741 Serotonin immunolabeling was performed with 1:25 rat anti-serotonin (Millipore Sigma,  
742 Cat#MAB352, RRID:AB\_11213564), 1:1000 rabbit anti-serotonin (ImmunoStar, Cat#20080,  
743 Hudson, WI ,RRID:AB\_572263) or 1:1000 goat anti-serotonin (ImmunoStar, Cat#20079,

744 RRID:AB\_572262). Where noted, GFP was labeled with 1:250 mouse anti-GFP (Sigma-Aldrich,  
745 Cat#G6539, RRID:AB\_259941; or, ThermoFisher, Waltham, MA, Cat#A-11120,  
746 RRID:AB\_221568). Secondary antibodies were used at 1:400 and include: Alexa Fluor 488, 594  
747 or 647 (Jackson ImmunoResearch Laboratories, Westgrove, PA, Cat#715-545-151, # 711-585-  
748 152, # 712-605-153) or Alexa Fluor 555 (Life Technologies, ThermoFisher, Cat#A-21428).

749 When serotonin receptor MiMIC-GAL4 lines were combined with VGlut, ChAT and  
750 GAD1 MiMIC-LexA (Supplemental Figure S2), brains were processed and imaged as described  
751 in Sizemore and Dacks 2016 (Sizemore et al., 2016).

752 MultiColor FlpOut (MCFO-1) sparse labeling was induced by heat activation at 37°C for  
753 10-15 minutes at least 2 days prior to dissection as described (Nern et al., 2015). Primary  
754 antibodies included 1:300 rabbit anti-HA (Cell Signaling Technology, Cat#3724, Danvers, MA,  
755 RRID:AB\_1549585), 1:150 rat anti-FLAG (Novus, Littleton, CA, Cat#NBP1-06712,  
756 RRID:AB\_1625982), and 1:400 anti-V5::Dylight-550 (Bio-Rad, Hercules, CA,  
757 Cat#MCA1360D550GA, RRID:AB\_2687576). N-Synaptobrevin GFP Reconstitution Across  
758 Synaptic Partners (sybGRASP) flies (Macpherson et al., 2015) were dissected, fixed and  
759 immunolabeled as described above, without KCl induction. The tissue was labeled with mouse  
760 antiserum specific to reconstituted GFP (1:250; Sigma-Aldrich, Cat#G6539, RRID:AB\_259941)  
761 (Gordon et al., 2009) and either anti-serotonin (antibodies listed above) or rabbit anti-VACHT  
762 (1:500; provided by Hakeem Lawal) (Boppana et al., 2017).

763 Imaging was performed with a Zeiss LSM 880 Confocal with Airyscan (Zeiss, Oberkochen,  
764 Germany) using a 40x water or 63x oil immersion objective. Images shown represent a single  
765 optical slice except where indicated. Post-hoc processing of images was done with Fiji  
766 (Schindelin et al., 2012) or Adobe Photoshop (Adobe, San Jose, CA) .

767 **FACs and RT-qPCR**

768 L2, T1 and L1 neurons were labeled using split-GAL4 drivers (Tuthill et al., 2013)  
769 combined with UAS-mCD8::GFP (RRID:BDSC\_5137). Brains were dissected on the day of  
770 eclosion and optic lobes were dissociated according to previously published methods (Tan et  
771 al., 2015) The dissociated optic lobe cells were separated by fluorescence-activated cell sorting  
772 (FACS) into GFP-positive and GFP-negative isolates using a BD FACS Aria II high-speed cell  
773 sorter in collaboration with the UCLA Jonsson Comprehensive Cancer Center (JCCC) and  
774 Center for AIDS Research Flow Cytometry Core Facility  
775 (<http://cyto.mednet.ucla.edu/home.html>). For FACS, each experiment was performed with 18-40  
776 brains, and yielded between 1,700-7,800 GFP<sup>+</sup> cells. RNA was extracted from isolated cells with  
777 ARCTURUS® PicoPure® RNA Isolation Kit (ThermoFisher, KIT0204) followed by reverse  
778 transcription with SuperScript III (Invitrogen, ThermoFisher, Cat#18080093).

779 RT-qPCR was performed for receptor mRNA using validated primers (Supplemental  
780 Table 2) and SYBR Green Power PCR Mix (Applied Biosystems, ThermoFisher) on an iQ5 real-  
781 time qPCR detection system (Bio-Rad). Primers were designed using Primer-Blast  
782 (<https://www.ncbi.nlm.nih.gov/tools/primer-blast/>) or were from the DGRC FlyPrimerBank (Hu et  
783 al., 2013); oligonucleotides were obtained from Integrated DNA Technologies (Coralville, Iowa).  
784 Primer pairs were validated to amplify a single product, verified by a single melting temperature  
785 and single band on an electrophoresis gel. The efficiency for each primer pair was between 85-  
786 115%. Comparisons between GFP<sup>+</sup> and GFP<sup>-</sup> samples were calculated as enrichment (i.e., fold  
787 change) using the comparative CT method (Schmittgen et al., 2008). A zero value was imputed  
788 for samples with no amplification (i.e., no CT value). Raw CT values are shown in Supplemental  
789 Table 1.

## 790 **Live Cell Imaging**

791 Calcium imaging was performed as previously described (Keles et al., 2017). Briefly,  
792 flies were anesthetized at 4°C and placed into a chemically etched metal shim within a larger

793 custom-built fly holder. The fly holder was based on a previously described design (Weir and  
794 Dickinson, 2015). The head capsule and the thorax were glued to the metal shim using UV-  
795 curable glue ([www.esslinger.com](http://www.esslinger.com)). The legs, proboscis and antennae were immobilized using  
796 beeswax applied with a heated metal probe (Waxelectric-1, Renfert). The head capsule was  
797 immersed in insect saline (103 mM NaCl, 3 mM KCl, 1.5mM CaCl<sub>2</sub>, 4 mM MgCl<sub>2</sub>, 26 mM  
798 NaHCO<sub>3</sub>, 1 mM NaH<sub>2</sub>PO<sub>4</sub>, 10 mM trehalose, 10 mM glucose, 5 mM TES, 2 mM sucrose)  
799 (Wilson et al., 2004). A small window on the right rear head capsule was opened using sharp  
800 forceps (Dumont, #5SF). Muscles and fat covering the optic lobe were cleared before placing  
801 the fly under the 2-photon microscope (VIVO, 3i: Intelligent Imaging Innovations, Denver, CO).  
802 Neurons expressing GCaMP6f were imaged at 920-nm using a Ti:Sapphire Laser (Chameleon  
803 Vision, Coherent). Images were acquired at 10-20 frames/s. Only female flies were used for live  
804 imaging experiments.

805 A custom-built gravity perfusion system was used for bath application of either serotonin  
806 or saline control to the fly's exposed optic lobe. The tissue was first perfused with insect saline  
807 containing 1µM tetrodotoxin citrate (TTX) (Alomone Labs, Jerusalem, Israel, Cat#T-550) for at  
808 least 5 minutes at 2 mL/min, prior to each recording. TTX remained present throughout the  
809 experiment. To examine the effects of serotonin on calcium levels, baseline GCaMP6f  
810 fluorescence was recorded for one minute before switching to the second input containing either  
811 100µM serotonin hydrochloride (Sigma Aldrich, Cat# H9523) or saline alone for an additional  
812 five minutes of recording. Due to perfusion tubing length and dead volume, the perfusion switch  
813 took approximately 1 min 45 s to reach the tissue.

#### 814 **Visual Stimulus Experiments**

815 Visual stimuli were shown using an arena composed of 48 eight by eight-pixel LED  
816 panels, at 470 nm (Adafruit, NY, NY). The panels were assembled into a curved display that  
817 extends 216° along the azimuth and ±35° in elevation. Each pixel subtended an angle of 2.2° on

818 the retina at the equatorial axis. To prevent spurious excitation of the imaging photomultiplier  
819 tubes, three layers of blue filter (Rosco no. 59 Indigo) were placed over the LED display.

820 Each stimulus consisted of a brief increment (light flash) or decrement (dark flash) of the  
821 entire display for 100ms, before returning to a mid-intensity brightness for 4.9s. Images were  
822 acquired at 25-30 frames/s. Stimuli were presented in sets of six bright and six dark flashes  
823 randomly shuffled for each minute of the experiment. Responses were then pooled for each  
824 minute. During the first minute, and prior to imaging, the tissue was perfused with saline for a  
825 baseline recording. At the end of the first minute, a valve controller (VC-6, Warner Instruments,  
826 Hamden, CT) activated by a TTL signal switched the perfusion to either saline with 100 $\mu$ M  
827 serotonin or saline alone; imaging then continued for an additional five minutes, for a total of  
828 one baseline set and five post-switch sets of stimuli. The perfusion switch took approximately  
829 50s to reach the tissue.

830

### 831 **Analysis**

832 Calcium imaging data were analyzed with Matlab R2017a (Mathworks, Natick, MA). Post  
833 hoc, recordings were corrected for movement of the brain within the imaging plane using a  
834 custom algorithm (Akin et al., 2016). Regions of interest (ROIs) were found semi-automatically  
835 for each experiment: first, the median intensity of all pixels across all image frames was found;  
836 this value was used as a threshold and all pixels with mean intensity below the threshold,  
837 typically within the image background, were discarded. The 1-D time-series of intensity for each  
838 remaining pixel was then extracted. K-means clustering was used to identify pixels with similar  
839 activity over the course of the experiment; three clusters were identified, and the cluster that  
840 included the highest number of pixels was used as an ROI. This reliably identified the pixels  
841 within active neurons in the imaging data and aided in identifying preparations with out-of-plane  
842 movement, which were discarded. The mean intensity within the ROI was found for each image

843 frame to produce a single time-series for the entire experiment. Approximately half of the bath  
844 application recordings showed oscillations in activity due to slow, periodic movement of the  
845 brain at around 0.04 Hz; we applied a notch filter at this frequency with a bandwidth of 0.005 Hz  
846 to remove these oscillations. For the bath application experiments (Figure 3), we plotted  $\Delta F/F$ ,  
847 defined as  $(F_t - F_0)/F_0$ , where  $F_t$  is the mean fluorescence in the ROI at the indicated time and  $F_0$   
848 is the mean value of  $F_t$  during 60 seconds of baseline activity at the beginning of the experiment  
849 and prior to the change in perfusion. For the visual stimulus experiments (Figure 6), we again  
850 plotted  $\Delta F/F$ , defined as  $(F_t - F_0)/F_0$ , where  $F_t$  is the mean fluorescence in the ROI at the indicated  
851 time and  $F_0$  is the mean of 30 seconds of non-consecutive baseline activity between trials in  
852 epoch 0 at the beginning of the experiment and prior to the change in perfusion (Figure 6A-E).  
853 For further analysis, we calculated  $F_{\text{peak}}$  for each epoch, defined as the maximum  $\Delta F/F$  value  
854 that occurred for each light or dark stimulus presentation within 1.75 s after cessation of the  
855 0.1 s flash; for each fly, we found the mean of the maximum values for the six light flashes or  
856 the six dark flashes that occurred within each epoch of 60 seconds. We then normalized the  
857  $F_{\text{peak}}$  values for each fly by calculating  $F_{\text{peak}}/F_{\text{peak}(0)}$ , where  $F_{\text{peak}(0)}$  is the fly's  $F_{\text{peak}}$  value for epoch  
858 0 at the beginning of the experiment and prior to the change in perfusion. The median of the  
859  $F_{\text{peak}}/F_{\text{peak}(0)}$  values was then found for the saline and serotonin groups (Figure 6F, G). We used  
860 a two-tailed Wilcoxon rank sum test to compare the  $F_{\text{peak}}/F_{\text{peak}(0)}$  values for the saline versus  
861 serotonin groups.

862 **Acknowledgements:** We thank members of Larry Zipursky's lab (UCLA) including Eilizabeth  
863 Zuniga Sanchez and Liming Tan for advice on FACS, RNA extraction and RT-qPCR. We thank  
864 members of the Frye and Krantz labs for helpful discussions, Aljoscha Nern (HHMI/Janelia  
865 Research Campus) and Herman Dierick (Baylor) for generously supplying fly lines, and Hakeem  
866 Lawal for the DVACHT antiserum.

867 **Funding:** This work was funded by R01 MH107390 (DEK), R01 MH114017 (DEK) R01  
868 EY026031 (MAF), IOS-1455869 (MAF), R03 DC013997 (AMD), R01 DC016293 (AMD) and a  
869 seed grant from the UCLA Depression Grand Challenge (DEK, MAF). MMS was supported by a  
870 National Science Foundation GRFP and UCLA Cota-Robles fellowship. TRS was supported by  
871 a Grant-In-Aid of Research (G20141015669888) from Sigma Xi, The Scientific Research  
872 Society.

873 **Competing interests:** The authors deny any relevant paid employment or consultancy, stock  
874 ownership, patent applications, personal relationships with relevant individuals, or membership  
875 of an advisory board.

876

877

878

## 879 **References**

- 880 Akin, O., & Zipursky, S. L. (2016). Frazzled promotes growth cone attachment at the source of a  
881 Netrin gradient in the *Drosophila* visual system. *Elife*, 5. doi: 10.7554/eLife.20762
- 882 Andres, M., Seifert, M., Spalthoff, C., Warren, B., Weiss, L., Giraldo, D., . . . Gopfert, M. C.  
883 (2016). Auditory Efferent System Modulates Mosquito Hearing. *Curr Biol*, 26(15), 2028-  
884 2036. doi: 10.1016/j.cub.2016.05.077
- 885 Arechiga, H., Banuelos, E., Frixione, E., Picones, A., & Rodriguez-Sosa, L. (1990). Modulation  
886 of crayfish retinal sensitivity by 5-hydroxytryptamine. *J Exp Biol*, 150, 123-143.
- 887 Bahl, A., Serbe, E., Meier, M., Ammer, G., & Borst, A. (2015). Neural Mechanisms for  
888 *Drosophila* Contrast Vision. *Neuron*, 88(6), 1240-1252. doi:  
889 10.1016/j.neuron.2015.11.004
- 890 Behnia, R., & Desplan, C. (2015). Visual circuits in flies: beginning to see the whole picture.  
891 *Curr Opin Neurobiol*, 34, 125-132. doi: 10.1016/j.conb.2015.03.010
- 892 Blenau, W., Daniel, S., Balfanz, S., Thamm, M., & Baumann, A. (2017). Dm5-HT2B:  
893 Pharmacological Characterization of the Fifth Serotonin Receptor Subtype of *Drosophila*  
894 *melanogaster*. *Front Syst Neurosci*, 11, 28. doi: 10.3389/fnsys.2017.00028
- 895 Boppana, S., Kendall, N., Akinrinsola, O., White, D., Patel, K., & Lawal, H. (2017).  
896 Immunolocalization of the vesicular acetylcholine transporter in larval and adult  
897 *Drosophila* neurons. *Neurosci Lett*, 643, 76-83. doi: 10.1016/j.neulet.2017.02.012
- 898 Borst, A., & Helmstaedter, M. (2015). Common circuit design in fly and mammalian motion  
899 vision. *Nat Neurosci*, 18(8), 1067-1076. doi: 10.1038/nn.4050



- 900 Brunert, D., Tsuno, Y., Rothermel, M., Shipley, M. T., & Wachowiak, M. (2016). Cell-Type-  
901 Specific Modulation of Sensory Responses in Olfactory Bulb Circuits by Serotonergic  
902 Projections from the Raphe Nuclei. *J Neurosci*, *36*(25), 6820-6835. doi:  
903 10.1523/JNEUROSCI.3667-15.2016
- 904 Bunin, M. A., & Wightman, R. M. (1999). Paracrine neurotransmission in the CNS: involvement  
905 of 5-HT. *Trends Neurosci*, *22*(9), 377-382.
- 906 Cao, G., Platasa, J., Pieribone, V. A., Raccuglia, D., Kunst, M., & Nitabach, M. N. (2013).  
907 Genetically targeted optical electrophysiology in intact neural circuits. *Cell*, *154*(4), 904-  
908 913. doi: 10.1016/j.cell.2013.07.027
- 909 Celada, P., Puig, M. V., Casanovas, J. M., Guillazo, G., & Artigas, F. (2001). Control of dorsal  
910 raphe serotonergic neurons by the medial prefrontal cortex: Involvement of serotonin-1A,  
911 GABA(A), and glutamate receptors. *J Neurosci*, *21*(24), 9917-9929.
- 912 Chen, B., Meinertzhagen, I. A., & Shaw, S. R. (1999). Circadian rhythms in light-evoked  
913 responses of the fly's compound eye, and the effects of neuromodulators 5-HT and the  
914 peptide PDF. *J Comp Physiol [A]*, *185*, 393-404.
- 915 Clark, D. A., Bursztyn, L., Horowitz, M. A., Schnitzer, M. J., & Clandinin, T. R. (2011). Defining  
916 the computational structure of the motion detector in *Drosophila*. *Neuron*, *70*(6), 1165-  
917 1177. doi: 10.1016/j.neuron.2011.05.023
- 918 Coates, K. E., Majot, A. T., Zhang, X., Michael, C. T., Spitzer, S. L., Gaudry, Q., & Dacks, A. M.  
919 (2017). Identified Serotonergic Modulatory Neurons Have Heterogeneous Synaptic  
920 Connectivity within the Olfactory System of *Drosophila*. *J Neurosci*, *37*(31), 7318-7331.  
921 doi: 10.1523/JNEUROSCI.0192-17.2017
- 922 Colas, J. F., Launay, J. M., Kellermann, O., Rosay, P., & Maroteaux, L. (1995). *Drosophila* 5-  
923 HT2 serotonin receptor: coexpression with fushi-tarazu during segmentation. *Proc Natl*  
924 *Acad Sci U S A*, *92*(12), 5441-5445.
- 925 Dacks, A. M., Christensen, T. A., & Hildebrand, J. G. (2008). Modulation of olfactory information  
926 processing in the antennal lobe of *Manduca sexta* by serotonin. *J Neurophysiol*, *99*(5),  
927 2077-2085. doi: 10.1152/jn.01372.2007
- 928 Davis, Fred P., Nern, Aljoscha, Picard, Serge, Reiser, Michael B., Rubin, Gerald M., Eddy, Sean  
929 R., & Henry, Gilbert L. (2018). A genetic, genomic, and computational resource for  
930 exploring neural circuit function. *bioRxiv*.
- 931 Descarries, L., & Mechawar, N. (2000). Ultrastructural evidence for diffuse transmission by  
932 monoamine and acetylcholine neurons of the central nervous system. *Prog Brain Res*,  
933 *125*, 27-47. doi: 10.1016/S0079-6123(00)25005-X
- 934 Diao, F., Ironfield, H., Luan, H., Shropshire, W. C., Ewer, J., Marr, E., . . . White, B. H. (2015).  
935 Plug-and-play genetic access to *drosophila* cell types using exchangeable exon  
936 cassettes. *Cell Rep*, *10*(8), 1410-1421. doi: 10.1016/j.celrep.2015.01.059
- 937 Douglass, J. K., & Strausfeld, N. J. (1995). Visual motion detection circuits in flies: peripheral  
938 motion computation by identified small-field retinotopic neurons. *J Neurosci*, *15*(8), 5596-  
939 5611.
- 940 Edwards, T. N., & Meinertzhagen, I. A. (2010). The functional organisation of glia in the adult  
941 brain of *Drosophila* and other insects. *Prog Neurobiol*, *90*(4), 471-497. doi:  
942 10.1016/j.pneurobio.2010.01.001
- 943 Fischbach, K. F., & Dittrich, A.P.M. (1989). The optic lobe of *Drosophila melanogaster*. I.  
944 A Golgi analysis of wild type structure. *Cell Tissue Res*, *258*, 441-475.
- 945 Fotowat, H., Harvey-Girard, E., Cheer, J. F., Krahe, R., & Maler, L. (2016). Subsecond Sensory  
946 Modulation of Serotonin Levels in a Primary Sensory Area and Its Relation to Ongoing  
947 Communication Behavior in a Weakly Electric Fish. *eNeuro*, *3*(5). doi:  
948 10.1523/ENEURO.0115-16.2016



- 949 Fuxe, K., Dahlstrom, A. B., Jonsson, G., Marcellino, D., Guescini, M., Dam, M., . . . Agnati, L.  
950 (2010). The discovery of central monoamine neurons gave volume transmission to the  
951 wired brain. *Prog Neurobiol*, *90*(2), 82-100. doi: 10.1016/j.pneurobio.2009.10.012
- 952 Gagolewicz, P. J., & Dringenberg, H. C. (2016). Age-Dependent Switch of the Role of  
953 Serotonergic 5-HT1A Receptors in Gating Long-Term Potentiation in Rat Visual Cortex  
954 In Vivo. *Neural Plast*, *2016*, 6404082. doi: 10.1155/2016/6404082
- 955 Gaspar, P., & Lillesaar, C. (2012). Probing the diversity of serotonin neurons. *Philos Trans R*  
956 *Soc Lond B Biol Sci*, *367*(1601), 2382-2394. doi: 10.1098/rstb.2011.0378
- 957 Gasque, G., Conway, S., Huang, J., Rao, Y., & Vosshall, L. B. (2013). Small molecule drug  
958 screening in *Drosophila* identifies the 5HT2A receptor as a feeding modulation target.  
959 *Sci Rep*, *3*, srep02120. doi: 10.1038/srep02120
- 960 Gnerer, J. P., Venken, K. J., & Dierick, H. A. (2015). Gene-specific cell labeling using MiMIC  
961 transposons. *Nucleic Acids Res*, *43*(8), e56. doi: 10.1093/nar/gkv113
- 962 Gordon, M. D., & Scott, K. (2009). Motor control in a *Drosophila* taste circuit. *Neuron*, *61*(3),  
963 373-384. doi: 10.1016/j.neuron.2008.12.033
- 964 Gu, Q., & Singer, W. (1995). Involvement of serotonin in developmental plasticity of kitten visual  
965 cortex. *Eur J Neurosci*, *7*(6), 1146-1153.
- 966 Halberstadt, A. L. (2015). Recent advances in the neuropsychopharmacology of serotonergic  
967 hallucinogens. *Behav Brain Res*, *277*, 99-120. doi: 10.1016/j.bbr.2014.07.016
- 968 Hamanaka, Y., Kinoshita, M., Homberg, U., & Arikawa, K. (2012). Immunocytochemical  
969 localization of amines and GABA in the optic lobe of the butterfly, *Papilio xuthus*. *PLoS*  
970 *One*, *7*(7), e41109. doi: 10.1371/journal.pone.0041109
- 971 Herve, D., Pickel, V. M., Joh, T. H., & Beaudet, A. (1987). Serotonin axon terminals in the  
972 ventral tegmental area of the rat: fine structure and synaptic input to dopaminergic  
973 neurons. *Brain Res*, *435*(1-2), 71-83.
- 974 Hevers, W., & Hardie, R. C. (1995). Serotonin modulates the voltage dependence of delayed  
975 rectifier and Shaker potassium channels in *Drosophila* photoreceptors. *Neuron*, *14*, 845-  
976 856.
- 977 Hoyer, D., Hannon, J. P., & Martin, G. R. (2002). Molecular, pharmacological and functional  
978 diversity of 5-HT receptors. *Pharmacol Biochem Behav*, *71*(4), 533-554.
- 979 Hu, Y., Sopko, R., Foos, M., Kelley, C., Flockhart, I., Ammeux, N., . . . Mohr, S. E. (2013).  
980 FlyPrimerBank: an online database for *Drosophila melanogaster* gene expression  
981 analysis and knockdown evaluation of RNAi reagents. *G3 (Bethesda)*, *3*(9), 1607-1616.  
982 doi: 10.1534/g3.113.007021
- 983 Huang, L., Yuan, T., Tan, M., Xi, Y., Hu, Y., Tao, Q., . . . Ren, C. (2017). A retinographic  
984 projection regulates serotonergic activity and looming-evoked defensive behaviour. *Nat*  
985 *Commun*, *8*, 14908. doi: 10.1038/ncomms14908
- 986 Ichikawa, T. (1994). Light suppresses the activity of serotonin-immunoreactive neurons in the  
987 optic lobe of the swallowtail butterfly. *Neurosci Lett*, *172*(1-2), 115-118.
- 988 Järvilehto, M., & Zettler, F. (1973). Electrophysiological-histological studies on some functional  
989 properties of visual cells and second order neurons of an insect retina. *Z Zellforsch*  
990 *Mikrosk Anat*, *136*(2), 291-306.
- 991 Joesch, M., Schnell, B., Raghu, S. V., Reiff, D. F., & Borst, A. (2010). ON and OFF pathways in  
992 *Drosophila* motion vision. *Nature*, *468*(7321), 300-304. doi: 10.1038/nature09545
- 993 Katz, Paul S. (1999). *Beyond neurotransmission : neuromodulation and its importance for*  
994 *information processing*. Oxford ; New York: Oxford University Press.
- 995 Keles, M. F., & Frye, M. A. (2017). Object-Detecting Neurons in *Drosophila*. *Curr Biol*, *27*(5),  
996 680-687. doi: 10.1016/j.cub.2017.01.012
- 997 Kloppenburg, P., Ferns, D., & Mercer, A. R. (1999). Serotonin enhances central olfactory  
998 neuron responses to female sex pheromone in the male sphinx moth *manduca sexta*. *J*  
999 *Neurosci*, *19*(19), 8172-8181.

- 1000 Kupfermann, I. (1979). Modulatory actions of neurotransmitters. *Annu Rev Neurosci*, 2, 447-  
1001 465. doi: 10.1146/annurev.ne.02.030179.002311
- 1002 Leitinger, G., Pabst, M. A., & Kral, K. (1999). Serotonin-immunoreactive neurones in the visual  
1003 system of the praying mantis: an immunohistochemical, confocal laser scanning and  
1004 electron microscopic study. *Brain Res*, 823(1-2), 11-23.
- 1005 Li, Y. H., Xiang, K., Xu, X., Zhao, X., Li, Y., Zheng, L., & Wang, J. (2018). Co-activation of both  
1006 5-HT1A and 5-HT7 receptors induced attenuation of glutamatergic synaptic transmission  
1007 in the rat visual cortex. *Neurosci Lett*, 686, 122-126. doi: 10.1016/j.neulet.2018.09.013
- 1008 Lombaert, N., Hennes, M., Gilissen, S., Schevenels, G., Aerts, L., Vanlaer, R., . . . Arckens, L.  
1009 (2018). 5-HTR2A and 5-HTR3A but not 5-HTR1A antagonism impairs the cross-modal  
1010 reactivation of deprived visual cortex in adulthood. *Mol Brain*, 11(1), 65. doi:  
1011 10.1186/s13041-018-0404-5
- 1012 Lottem, E., Lorincz, M. L., & Mainen, Z. F. (2016). Optogenetic Activation of Dorsal Raphe  
1013 Serotonin Neurons Rapidly Inhibits Spontaneous But Not Odor-Evoked Activity in  
1014 Olfactory Cortex. *J Neurosci*, 36(1), 7-18. doi: 10.1523/JNEUROSCI.3008-15.2016
- 1015 Macpherson, L. J., Zaharieva, E. E., Kearney, P. J., Alpert, M. H., Lin, T. Y., Turan, Z., . . .  
1016 Gallio, M. (2015). Dynamic labelling of neural connections in multiple colours by trans-  
1017 synaptic fluorescence complementation. *Nat Commun*, 6, 10024. doi:  
1018 10.1038/ncomms10024
- 1019 Maisak, M. S., Haag, J., Ammer, G., Serbe, E., Meier, M., Leonhardt, A., . . . Borst, A. (2013). A  
1020 directional tuning map of Drosophila elementary motion detectors. *Nature*, 500(7461),  
1021 212-216. doi: 10.1038/nature12320
- 1022 Marder, E. (2012). Neuromodulation of neuronal circuits: back to the future. *Neuron*, 76(1), 1-11.  
1023 doi: 10.1016/j.neuron.2012.09.010
- 1024 Marder, E., O'Leary, T., & Shruti, S. (2014). Neuromodulation of circuits with variable  
1025 parameters: single neurons and small circuits reveal principles of state-dependent and  
1026 robust neuromodulation. *Annu Rev Neurosci*, 37, 329-346. doi: 10.1146/annurev-neuro-  
1027 071013-013958
- 1028 Meinertzhagen, I. A., & O'Neil, S. D. (1991). Synaptic organization of columnar elements in the  
1029 lamina of the wild type in Drosophila melanogaster. *J Comp Neurol*, 305(2), 232-263.  
1030 doi: 10.1002/cne.903050206
- 1031 Moreau, A. W., Amar, M., Le Roux, N., Morel, N., & Fossier, P. (2010). Serotonergic fine-  
1032 tuning of the excitation-inhibition balance in rat visual cortical networks. *Cereb Cortex*,  
1033 20(2), 456-467. doi: 10.1093/cercor/bhp114
- 1034 Moukhles, H., Bosler, O., Bolam, J. P., Vallee, A., Umbriaco, D., Geffard, M., & Doucet, G.  
1035 (1997). Quantitative and morphometric data indicate precise cellular interactions  
1036 between serotonin terminals and postsynaptic targets in rat substantia nigra.  
1037 *Neuroscience*, 76(4), 1159-1171.
- 1038 Nadim, F., & Bucher, D. (2014). Neuromodulation of neurons and synapses. *Curr Opin*  
1039 *Neurobiol*, 29, 48-56. doi: 10.1016/j.conb.2014.05.003
- 1040 Nässel, D. R. (1988). Serotonin and serotonin-immunoreactive neurons in the nervous system  
1041 of insects. *Prog Neurobiol*, 30(1), 1-85.
- 1042 Nässel, D. R., & Elekes, K. (1984). Ultrastructural demonstration of serotonin-immunoreactivity  
1043 in the nervous system of an insect (*Calliphora erythrocephala*). *Neurosci Lett*, 48(2),  
1044 203-210.
- 1045 Nässel, D. R., Meyer, E. P., & Klemm, N. (1985). Mapping and ultrastructure of serotonin-  
1046 immunoreactive neurons in the optic lobes of three insect species. *J Comp Neurol*,  
1047 232(2), 190-204. doi: 10.1002/cne.902320205
- 1048 Nässel, D. R., Ohlsson, L., & Sivasubramanian, P. (1987). Postembryonic differentiation of  
1049 serotonin-immunoreactive neurons in fleshfly optic lobes developing in situ or cultured in  
1050 vivo without eye discs. *J Comp Neurol*, 255(3), 327-340. doi: 10.1002/cne.902550302

- 1051 Nern, A., Pfeiffer, B. D., & Rubin, G. M. (2015). Optimized tools for multicolor stochastic labeling  
1052 reveal diverse stereotyped cell arrangements in the fly visual system. *Proc Natl Acad Sci*  
1053 *U S A*, *112*(22), E2967-2976. doi: 10.1073/pnas.1506763112
- 1054 Nichols, C. D. (2007). 5-HT<sub>2</sub> receptors in *Drosophila* are expressed in the brain and modulate  
1055 aspects of circadian behaviors. *Dev Neurobiol*, *67*(6), 752-763. doi: 10.1002/dneu.20370
- 1056 Nicolai, L. J., Ramaekers, A., Raemaekers, T., Drozdzecki, A., Mauss, A. S., Yan, J., . . .  
1057 Hassan, B. A. (2010). Genetically encoded dendritic marker sheds light on neuronal  
1058 connectivity in *Drosophila*. *Proc Natl Acad Sci U S A*, *107*(47), 20553-20558. doi:  
1059 10.1073/pnas.1010198107
- 1060 Ogawa, S. K., Cohen, J. Y., Hwang, D., Uchida, N., & Watabe-Uchida, M. (2014). Organization  
1061 of monosynaptic inputs to the serotonin and dopamine neuromodulatory systems. *Cell*  
1062 *Rep*, *8*(4), 1105-1118. doi: 10.1016/j.celrep.2014.06.042
- 1063 Papesch, M. A., & Hurley, L. M. (2016). Modulation of auditory brainstem responses by serotonin  
1064 and specific serotonin receptors. *Hear Res*, *332*, 121-136. doi:  
1065 10.1016/j.heares.2015.11.014
- 1066 Petzold, G. C., Hagiwara, A., & Murthy, V. N. (2009). Serotonergic modulation of odor input to  
1067 the mammalian olfactory bulb. *Nat Neurosci*, *12*(6), 784-791. doi: 10.1038/nn.2335
- 1068 Pollak Dorocic, I., Furth, D., Xuan, Y., Johansson, Y., Pozzi, L., Silberberg, G., . . . Meletis, K.  
1069 (2014). A whole-brain atlas of inputs to serotonergic neurons of the dorsal and median  
1070 raphe nuclei. *Neuron*, *83*(3), 663-678. doi: 10.1016/j.neuron.2014.07.002
- 1071 Polter, A. M., & Li, X. (2010). 5-HT<sub>1A</sub> receptor-regulated signal transduction pathways in brain.  
1072 *Cell Signal*, *22*(10), 1406-1412. doi: 10.1016/j.cellsig.2010.03.019
- 1073 Rivera-Alba, M., Vitaladevuni, S. N., Mishchenko, Y., Lu, Z., Takemura, S. Y., Scheffer, L., . . .  
1074 de Polavieja, G. G. (2011). Wiring economy and volume exclusion determine neuronal  
1075 placement in the *Drosophila* brain. *Curr Biol*, *21*(23), 2000-2005. doi:  
1076 10.1016/j.cub.2011.10.022
- 1077 Saifullah, A. S., & Tomioka, K. (2002). Serotonin sets the day state in the neurons that control  
1078 coupling between the optic lobe circadian pacemakers in the cricket *Gryllus bimaculatus*.  
1079 *J Exp Biol*, *205*(Pt 9), 1305-1314.
- 1080 Saudou, F., Boschert, U., Amlaiky, N., Plassat, J. L., & Hen, R. (1992). A family of *Drosophila*  
1081 serotonin receptors with distinct intracellular signalling properties and expression  
1082 patterns. *EMBO J*, *11*(1), 7-17.
- 1083 Schafer, S., & Bicker, G. (1986). Common projection areas of 5-HT- and GABA-like  
1084 immunoreactive fibers in the visual system of the honeybee. *Brain Res*, *380*(2), 368-370.
- 1085 Schindelin, J., Arganda-Carreras, I., Frise, E., Kaynig, V., Longair, M., Pietzsch, T., . . .  
1086 Cardona, A. (2012). Fiji: an open-source platform for biological-image analysis. *Nat*  
1087 *Methods*, *9*(7), 676-682. doi: 10.1038/nmeth.2019
- 1088 Schmittgen, T. D., & Livak, K. J. (2008). Analyzing real-time PCR data by the comparative C(T)  
1089 method. *Nat Protoc*, *3*(6), 1101-1108.
- 1090 Seillier, L., Lorenz, C., Kawaguchi, K., Ott, T., Nieder, A., Pourriahi, P., & Nienborg, H. (2017).  
1091 Serotonin Decreases the Gain of Visual Responses in Awake Macaque V1. *J Neurosci*,  
1092 *37*(47), 11390-11405. doi: 10.1523/JNEUROSCI.1339-17.2017
- 1093 Shimegi, S., Kimura, A., Sato, A., Aoyama, C., Mizuyama, R., Tsunoda, K., . . . Sato, H. (2016).  
1094 Cholinergic and serotonergic modulation of visual information processing in monkey V1.  
1095 *J Physiol Paris*, *110*(1-2), 44-51. doi: 10.1016/j.jphysparis.2016.09.001
- 1096 Shinomiya, K., Huang, G., Lu, Z., Parag, T., Xu, C. S., Aniceto, R., . . . Meinertzhagen, I. A.  
1097 (2019). Comparisons between the ON- and OFF-edge motion pathways in the  
1098 *Drosophila* brain. *Elife*, *8*. doi: 10.7554/eLife.40025
- 1099 Shinomiya, K., Karuppudurai, T., Lin, T. Y., Lu, Z., Lee, C. H., & Meinertzhagen, I. A. (2014).  
1100 Candidate neural substrates for off-edge motion detection in *Drosophila*. *Curr Biol*,  
1101 *24*(10), 1062-1070. doi: 10.1016/j.cub.2014.03.051

- 1102 Sizemore, T. R., & Dacks, A. M. (2016). Serotonergic Modulation Differentially Targets Distinct  
1103 Network Elements within the Antennal Lobe of *Drosophila melanogaster*. *Sci Rep*, 6,  
1104 37119. doi: 10.1038/srep37119
- 1105 Strother, J. A., Nern, A., & Reiser, M. B. (2014). Direct observation of ON and OFF pathways in  
1106 the *Drosophila* visual system. *Curr Biol*, 24(9), 976-983. doi: 10.1016/j.cub.2014.03.017
- 1107 Takemura, S. Y., Bharioke, A., Lu, Z., Nern, A., Vitaladevuni, S., Rivlin, P. K., . . . Chklovskii, D.  
1108 B. (2013). A visual motion detection circuit suggested by *Drosophila* connectomics.  
1109 *Nature*, 500(7461), 175-181. doi: 10.1038/nature12450
- 1110 Takemura, S. Y., Karuppururai, T., Ting, C. Y., Lu, Z., Lee, C. H., & Meinertzhagen, I. A.  
1111 (2011). Cholinergic circuits integrate neighboring visual signals in a *Drosophila* motion  
1112 detection pathway. *Curr Biol*, 21(24), 2077-2084. doi: 10.1016/j.cub.2011.10.053
- 1113 Takemura, S. Y., Lu, Z., & Meinertzhagen, I. A. (2008). Synaptic circuits of the *Drosophila* optic  
1114 lobe: the input terminals to the medulla. *J Comp Neurol*, 509(5), 493-513. doi:  
1115 10.1002/cne.21757
- 1116 Takemura, S. Y., Nern, A., Chklovskii, D. B., Scheffer, L. K., Rubin, G. M., & Meinertzhagen, I.  
1117 A. (2017). The comprehensive connectome of a neural substrate for 'ON' motion  
1118 detection in. *Elife*, 6. doi: 10.7554/eLife.24394
- 1119 Takemura, S. Y., Xu, C. S., Lu, Z., Rivlin, P. K., Parag, T., Olbris, D. J., . . . Scheffer, L. K.  
1120 (2015). Synaptic circuits and their variations within different columns in the visual system  
1121 of *Drosophila*. *Proc Natl Acad Sci U S A*, 112(44), 13711-13716. doi:  
1122 10.1073/pnas.1509820112
- 1123 Tan, L., Zhang, K. X., Pecot, M. Y., Nagarkar-Jaiswal, S., Lee, P. T., Takemura, S. Y., . . .  
1124 Zipursky, S. L. (2015). Ig Superfamily Ligand and Receptor Pairs Expressed in Synaptic  
1125 Partners in *Drosophila*. *Cell*, 163(7), 1756-1769. doi: 10.1016/j.cell.2015.11.021
- 1126 Trakhtenberg, E. F., Pita-Thomas, W., Fernandez, S. G., Patel, K. H., Venugopalan, P.,  
1127 Shechter, J. M., . . . Goldberg, J. L. (2017). Serotonin receptor 2C regulates neurite  
1128 growth and is necessary for normal retinal processing of visual information. *Dev*  
1129 *Neurobiol*, 77(4), 419-437. doi: 10.1002/dneu.22391
- 1130 Trueta, C., & De-Miguel, F. F. (2012). Extrasynaptic exocytosis and its mechanisms: a source of  
1131 molecules mediating volume transmission in the nervous system. *Front Physiol*, 3, 319.  
1132 doi: 10.3389/fphys.2012.00319
- 1133 Tuthill, J. C., Nern, A., Holtz, S. L., Rubin, G. M., & Reiser, M. B. (2013). Contributions of the 12  
1134 neuron classes in the fly lamina to motion vision. *Neuron*, 79(1), 128-140. doi:  
1135 10.1016/j.neuron.2013.05.024
- 1136 Valles, A. M., & White, K. (1988). Serotonin-containing neurons in *Drosophila melanogaster*:  
1137 development and distribution. *J Comp Neurol*, 268(3), 414-428. doi:  
1138 10.1002/cne.902680310
- 1139 Venken, K. J., Schulze, K. L., Haelterman, N. A., Pan, H., He, Y., Evans-Holm, M., . . . Bellen,  
1140 H. J. (2011). MiMIC: a highly versatile transposon insertion resource for engineering  
1141 *Drosophila melanogaster* genes. *Nat Methods*, 8(9), 737-743.
- 1142 Vizi, E. S., Fekete, A., Karoly, R., & Mike, A. (2010). Non-synaptic receptors and transporters  
1143 involved in brain functions and targets of drug treatment. *Br J Pharmacol*, 160(4), 785-  
1144 809. doi: 10.1111/j.1476-5381.2009.00624.x
- 1145 Wang, Y., Gu, Q., & Cynader, M. S. (1997). Blockade of serotonin-2C receptors by mesulergine  
1146 reduces ocular dominance plasticity in kitten visual cortex. *Exp Brain Res*, 114(2), 321-  
1147 328.
- 1148 Watakabe, A., Komatsu, Y., Sadakane, O., Shimegi, S., Takahata, T., Higo, N., . . . Yamamori,  
1149 T. (2009). Enriched expression of serotonin 1B and 2A receptor genes in macaque  
1150 visual cortex and their bidirectional modulatory effects on neuronal responses. *Cereb*  
1151 *Cortex*, 19(8), 1915-1928. doi: 10.1093/cercor/bhn219



- 1152 Weissbourd, B., Ren, J., DeLoach, K. E., Guenther, C. J., Miyamichi, K., & Luo, L. (2014).  
1153 Presynaptic partners of dorsal raphe serotonergic and GABAergic neurons. *Neuron*,  
1154 83(3), 645-662. doi: 10.1016/j.neuron.2014.06.024
- 1155 Wilson, R. I., Turner, G. C., & Laurent, G. (2004). Transformation of olfactory representations in  
1156 the *Drosophila* antennal lobe. *Science*, 303(5656), 366-370. doi:  
1157 10.1126/science.1090782
- 1158 Witz, P., Amlaiky, N., Plassat, J. L., Maroteaux, L., Borrelli, E., & Hen, R. (1990). Cloning and  
1159 characterization of a *Drosophila* serotonin receptor that activates adenylate cyclase.  
1160 *Proc Natl Acad Sci U S A*, 87(22), 8940-8944.
- 1161 Xu, L., He, J., Kaiser, A., Graber, N., Schlager, L., Ritze, Y., & Scholz, H. (2016). A Single Pair  
1162 of Serotonergic Neurons Counteracts Serotonergic Inhibition of Ethanol Attraction in  
1163 *Drosophila*. *PLoS One*, 11(12), e0167518. doi: 10.1371/journal.pone.0167518
- 1164 Yang, H. H., St-Pierre, F., Sun, X., Ding, X., Lin, M. Z., & Clandinin, T. R. (2016). Subcellular  
1165 Imaging of Voltage and Calcium Signals Reveals Neural Processing In Vivo. *Cell*,  
1166 166(1), 245-257. doi: 10.1016/j.cell.2016.05.031
- 1167 Yuan, Q., Lin, F., Zheng, X., & Sehgal, A. (2005). Serotonin modulates circadian entrainment in  
1168 *Drosophila*. *Neuron*, 47(1), 115-127. doi: 10.1016/j.neuron.2005.05.027
- 1169 Zhang, T., Huang, L., Zhang, L., Tan, M., Pu, M., Pickard, G. E., . . . Ren, C. (2016). ON and  
1170 OFF retinal ganglion cells differentially regulate serotonergic and GABAergic activity in  
1171 the dorsal raphe nucleus. *Sci Rep*, 6, 26060. doi: 10.1038/srep26060
- 1172 Zhang, X., & Gaudry, Q. (2016). Functional integration of a serotonergic neuron in the  
1173 *Drosophila* antennal lobe. *Elife*, 5. doi: 10.7554/eLife.16836
- 1174 Zheng, L., de Polavieja, G. G., Wolfram, V., Asyali, M. H., Hardie, R. C., & Juusola, M. (2006).  
1175 Feedback network controls photoreceptor output at the layer of first visual synapses in  
1176 *Drosophila*. *J Gen Physiol*, 127(5), 495-510. doi: 10.1085/jgp.200509470
- 1177 Zhou, X., Zhang, R., Zhang, S., Wu, J., & Sun, X. (2018). Activation of 5-HT1A receptors  
1178 promotes retinal ganglion cell function by inhibiting the cAMP-PKA pathway to modulate  
1179 presynaptic GABA release in chronic glaucoma. *J Neurosci*. doi:  
1180 10.1523/JNEUROSCI.1685-18.2018

1181

1182
